# Supplementary material for: Tandem trifluoromethylthiolation/aryl migration of aryl alkynoates to trifluoromethylthiolated alkenes
Source: Royal Society of Chemistry journal article supplement (doi:10.1039/c7cc06232j), 2017-01-01

# Supporting Information

## Tandem Trifluoromethylthiolation/Aryl Migration of Aryl Alkynoates to Trifluoromethylthiolated Alkenes

Huan Li,<sup>a</sup> Shuai Liu,<sup>a</sup> Yangen Huang,<sup>a</sup> Xiu-Hua Xu<sup>b</sup> and Feng-Ling Qing<sup>\*a,b</sup>

<sup>a</sup> College of Chemistry, Chemical Engineering and Biotechnology, Donghua University, 2999 North Renmin Lu, Shanghai 201620, China

<sup>b</sup>Key Laboratory of Organofluorine Chemistry, Shanghai Institute of Organic Chemistry, University of Chinese Academy of Science, Chinese Academy of Science, 345 Lingling Lu, Shanghai 200032, China

## Table of Contents

|                                                                                                         |            |
|---------------------------------------------------------------------------------------------------------|------------|
| <b>1 General Information.....</b>                                                                       | <b>S2</b>  |
| <b>2 Preparation of Aryl Alkynoates.....</b>                                                            | <b>S2</b>  |
| <b>3 Trifluoromethylthiolation/Cyclization of Aryl Alkynoate 1a.....</b>                                | <b>S4</b>  |
| <b>4 Trifluoromethylthiolation/Aryl Migration of Aryl Alkynoates.....</b>                               | <b>S5</b>  |
| <b>5 Mechanistic Investigation.....</b>                                                                 | <b>S13</b> |
| <b>6. Copies of <sup>1</sup>H, <sup>19</sup>F, and <sup>13</sup>C NMR Spectra for the Products.....</b> | <b>S16</b> |

## 1. General Information.

$^1\text{H}$  and  $^{19}\text{F}$  NMR ( $\text{CFCl}_3$  as outside standard and low field is positive) spectra were recorded on a Bruker AM 400 or 600 spectrometer.  $^{13}\text{C}$  NMR spectra were recorded on a Bruker AM 400 or 600 spectrometer. Chemical shifts ( $\delta$ ) were reported in ppm, and coupling constants ( $J$ ) were in Hertz (Hz). The following abbreviations were used to explain the multiplicities: s = singlet, d = doublet, t = triplet, q = quartet, m = multiplet.

**Materials:** Unless otherwise noted, all reagents were obtained commercially and used without further purification. DMSO and  $\text{CH}_3\text{CN}$  was distilled from  $\text{CaH}_2$  and stored with 4 Å molecular sieves. Reactions were performed using glassware that was flame-dried under vacuum.

## 2. Preparation of Aryl Alkynoates.

The phenylpropionic acid **1aa** was purchased and used directly from commercial sources. Substrates **1ab-1ap**<sup>1</sup> and **1a-1u**<sup>2-4</sup> were prepared in accordance with methods described in the references.

### General methods for preparation of aryl alkynyl carboxylic acids (**1ab-1ap**)<sup>1</sup>

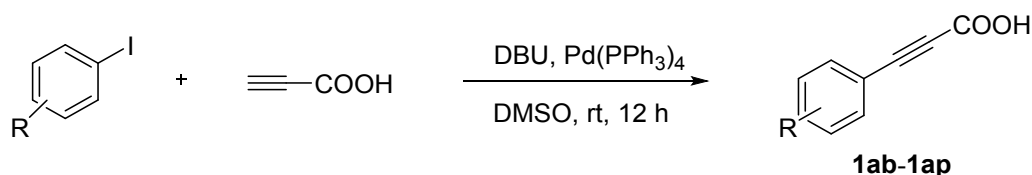

Aryl iodides (6.0 mmol, 1.0 equiv), DBU (2.01 g, 13.2 mmol, 2.2 equiv), and  $\text{Pd}(\text{PPh}_3)_4$  (346.7 mg, 0.3 mmol, 5 mol %) were mixed in DMSO (10 mL). A solution of propiolic acid (462.2 mg, 6.6 mmol, 1.1 equiv) in DMSO (5 mL) was added into the flask. The mixture was stirred at room temperature for 12 h. After the reaction was complete, EtOAc (10 mL) was poured into the reaction mixture. The reaction mixture was extracted with saturated aqueous  $\text{NaHCO}_3$ . The aqueous layer was separated, acidified to pH = 1 by addition of cold HCl (1 N), and extracted with DCM. The combined organic layers were dried with anhydrous  $\text{Na}_2\text{SO}_4$  and filtered, and the solvent was removed under reduced pressure. The resulting crude product was purified by column chromatography on silica gel to provide the desired product.

### Preparation of aryl alkynoates (**1a-1u**)<sup>2-4</sup>

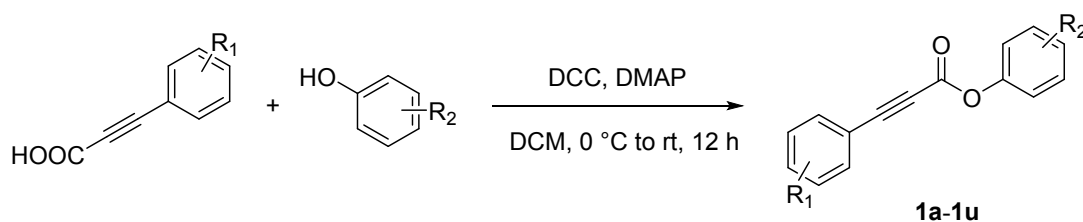

To a solution of phenol (3.0 mmol, 1.0 equiv) in CH<sub>2</sub>Cl<sub>2</sub> (12 mL) was added aryl alkynyl carboxylic acids (3.3 mmol, 1.1 equiv) at 0 °C. Then, a mixture of DCC (873.0 mg, 4.4 mmol, 1.5 equiv) and DMAP (36.0 mg, 1.5 mmol, 0.1 equiv) in CH<sub>2</sub>Cl<sub>2</sub> (6 mL) was added dropwise. The resulting mixture was stirred at room temperature for 12 hours. Then the crude mixture was filtered and washed with CH<sub>2</sub>Cl<sub>2</sub> (15 mL). The combined organic phase was concentrated under reduced pressure to give a residue which was purified by a silica gel column chromatography to give the desired product.

### Preparation of 4-fluoro-3-methylphenyl 3-phenylpropiolate **1t**

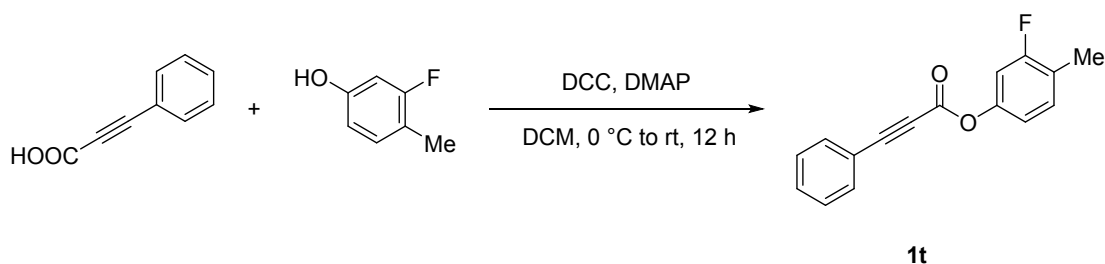

To a solution of 3-fluoro-4-methylphenol (378.4 mg, 3.0 mmol, 1.0 equiv) in CH<sub>2</sub>Cl<sub>2</sub> (12 mL) was added 3-phenylpropionic acid (481.8 mg, 3.3 mmol, 1.1 equiv) at 0 °C. Then, a mixture of DCC (873.0 mg, 4.4 mmol, 1.5 equiv) and DMAP (36.0 mg, 1.5 mmol, 0.1 equiv) in CH<sub>2</sub>Cl<sub>2</sub> (6 mL) was added dropwise. The resulting mixture was stirred at room temperature for 12 hours. Then the crude mixture was filtered and washed with CH<sub>2</sub>Cl<sub>2</sub> (15 mL). The combined organic phase was concentrated under reduced pressure to give a residue which was purified by a silica gel column chromatography (petroleum ether / EtOAc = 100:1) to give product **1t** as a white solid (600.0 mg, 79%). M.p. 55-57 °C. <sup>1</sup>H NMR (400 MHz, CDCl<sub>3</sub>): δ ppm 7.53 (d, *J* = 7.9 Hz, 2H), 7.39 (t, *J* = 7.2 Hz, 1H), 7.31 (t, *J* = 7.6 Hz, 2H), 7.13-7.09 (m, 1H), 6.83-6.80 (m, 2H), 2.17 (s, 3H). <sup>19</sup>F NMR (377 MHz, CDCl<sub>3</sub>): δ ppm -113.8--113.9 (m, 1F). <sup>13</sup>C NMR (101 MHz, CDCl<sub>3</sub>): δ ppm 161.0 (d, *J* = 246.8 Hz), 152.0, 148.7 (d, *J* = 10.7 Hz), 133.2, 131.6 (d, *J* = 6.2 Hz), 131.1, 128.7, 123.1 (d, *J* = 17.1 Hz), 119.2, 116.9 (d, *J* = 3.7 Hz), 109.1 (d, *J* = 25.7 Hz), 89.0, 80.1, 14.1 (d, *J* = 3.2 Hz). IR (KBr): ν 3334, 1380, 1088, 1046, 880, 629, 430 cm<sup>-1</sup>. MS (EI) *m/z*: 254 [M]<sup>+</sup>. HRMS (EI) *m/z*: Calcd for C<sub>16</sub>H<sub>11</sub>FO<sub>2</sub> 254.0743, found [M]<sup>+</sup>: 254.0747.

### Reference:

- [1] K. Park, T. Palani, A. Pyo and S. Lee. *Tetrahedron Lett.*, 2012, **53**, 733.
- [2] S.-Y. Ni, W. -X. Sha, L.-J. Zhang, C. X., H.-B. Mei, J.-L. He and Y. Pan. *Org. Lett.*, 2016, **18**, 712.
- [3] V. Lellek and H.-J. Hansen, *Helv. Chim. Acta*, 2001, **84**, 3548.
- [4] W.-C. Gao, T. Liu, B. Zhang, X. Li, W.-L. Wei and H.-H. Chang. *J. Org. Chem.*, 2016, **81**, 11297.

### 3. Trifluoromethylthiolation/Cyclization of Aryl Alkynoate **1a**

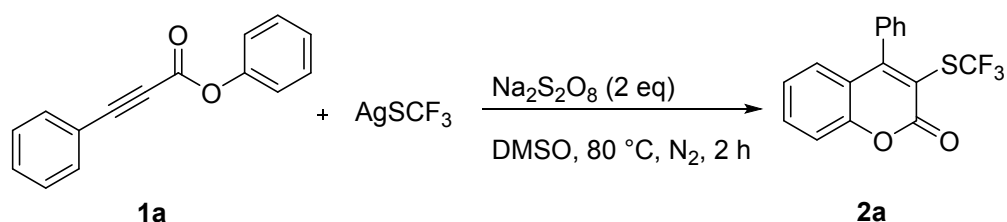

A mixture of **1a** (44.4 mg, 0.2 mmol, 1.0 equiv), AgSCF<sub>3</sub> (104.0 mg, 0.50 mmol, 2.5 equiv) and Na<sub>2</sub>S<sub>2</sub>O<sub>8</sub> (119.2 mg, 0.50 mmol, 2.5 equiv) in DMSO (4.0 mL) was added tube that was sealed with a septum, evacuated, and backfilled with nitrogen three times. DMSO (4.0 mL) was added to the tube. Then, the tube was stirred at 80 °C for 2 h. After the reaction was complete, saturated ammonium chloride solution was added. The resulting mixture was extracted with ethyl acetate for three times. The combined organic layer was dried over anhydrous Na<sub>2</sub>SO<sub>4</sub> and concentrated under reduced pressure. The residue was purified by silica gel column chromatography with PE:EA=100:1 to give product **2a** as a yellow solid (50.9 mg, 79%). <sup>1</sup>H NMR (400 MHz, CDCl<sub>3</sub>): δ ppm 7.64 (t, *J* = 7.7 Hz, 1H), 7.57-7.55 (m, 3H), 7.43 (d, *J* = 8.3 Hz, 1H), 7.27-7.18 (m, 3H), 7.11 (d, *J* = 7.9 Hz, 1H). <sup>19</sup>F NMR (377 MHz, CDCl<sub>3</sub>): δ ppm -40.40 (s, 3F). <sup>13</sup>C NMR (101 MHz, CDCl<sub>3</sub>): δ ppm 165.6, 159.3, 154.0, 134.2, 134.0, 129.5, 129.4, 128.7 (q, *J* = 313.1 Hz), 128.6, 128.2, 124.8, 120.2, 117.1, 113.1. MS (EI) *m/z*: 322 [M]<sup>+</sup>. These data matched those previously reported in reference *Org. Chem. Front.*, 2015, **2**, 1511.

#### 4. Trifluoromethylthiolation/Aryl Migration of Aryl Alkynoates (3a-3u)

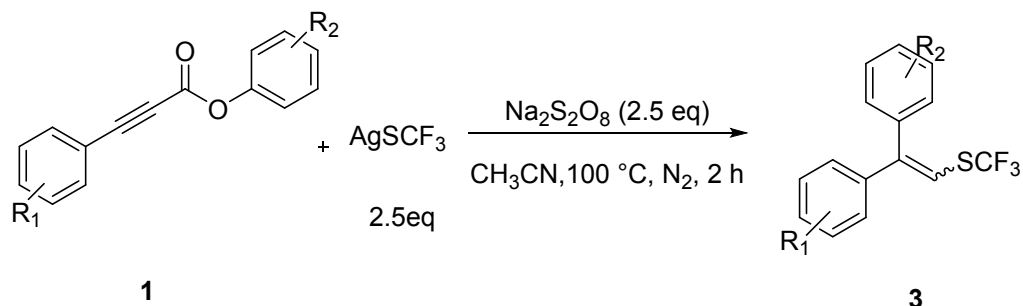

A mixture of **1** (0.2 mmol, 1.0 equiv), AgSCF<sub>3</sub> (104.0 mg, 0.50 mmol, 2.5 equiv) and Na<sub>2</sub>S<sub>2</sub>O<sub>8</sub> (119.2 mg, 0.50 mmol, 2.5 equiv) was added tube that was sealed with a septum, evacuated, and backfilled with nitrogen three times. CH<sub>3</sub>CN (4.0 mL) was added to the tube. Then, the tube was stirred at 100 °C for 2 h. After the reaction was complete, saturated ammonium chloride solution was added. The resulting mixture was extracted with ethyl acetate for three times. The combined organic layer was dried over anhydrous Na<sub>2</sub>SO<sub>4</sub> and concentrated under reduced pressure. The residue was purified by silica gel column chromatography with PE to give the desired product (**3a-3u**).

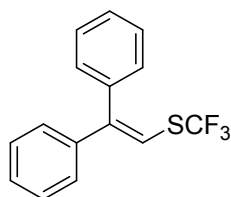

**(2,2-Diphenylvinyl)(trifluoromethyl)sulfane (3a)** (31.0 mg, 52%): Yellow oil. <sup>1</sup>H NMR (400 MHz, CDCl<sub>3</sub>): δ ppm 7.34 (q, *J* = 6.1 Hz, 3H), 7.23-7.13 (m, 7H), 6.69 (s, 1H). <sup>19</sup>F NMR (377 MHz, CDCl<sub>3</sub>): δ ppm -42.46 (s, 3F). <sup>13</sup>C NMR (101MHz, CDCl<sub>3</sub>): δ ppm 145.5, 139.2, 137.0, 128.7 (q, *J* = 310.1 Hz), 128.3, 127.6, 127.5, 127.4, 127.3, 126.4, 111.0 (q, *J* = 3.3 Hz). IR (KBr): ν 1495, 1444, 1285, 1109, 736, 698, 625, 486 cm<sup>-1</sup>. MS (EI) *m/z*: 280 [M]<sup>+</sup>. HRMS (EI) *m/z*: Calcd for C<sub>15</sub>H<sub>11</sub>F<sub>3</sub>S 280.0534, found [M]<sup>+</sup>: 280.0526. These data matched those previously reported in reference *Chem. Eur. J.*, 2016, **22**, 4395.

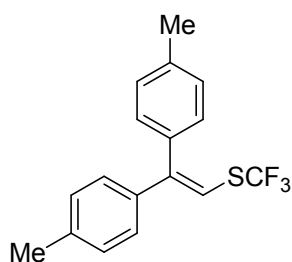

**(2,2-Di-p-tolylvinyl)(trifluoromethyl)sulfane (3b)** (40.7 mg, 66%): Yellow oil. <sup>1</sup>H NMR (400 MHz, CDCl<sub>3</sub>): δ ppm 7.17-7.13 (m, 2H), 7.07-7.01 (m, 6H), 6.53 (s, 1H), 2.32 (s, 3H), 2.27 (s, 3H). <sup>19</sup>F NMR (377 MHz, CDCl<sub>3</sub>): δ ppm -42.74 (s, 3F). <sup>13</sup>C

NMR (101 MHz, CDCl<sub>3</sub>):  $\delta$  145.6, 137.4, 137.3, 136.7, 134.2, 128.8 (q,  $J$  = 309.1 Hz), 128.3, 128.2, 128.1, 126.4, 109.6 (q,  $J$  = 3.2 Hz), 20.3, 20.1. IR (KBr):  $\nu$  2921, 1612, 1514, 1164, 1110, 929, 822, 771 cm<sup>-1</sup>. MS (EI)  $m/z$ : 308 [M]<sup>+</sup>. HRMS (EI)  $m/z$ : Calcd for C<sub>17</sub>H<sub>15</sub>F<sub>3</sub>S 308.0847, found [M]<sup>+</sup>: 308.0838. These data match those previously reported in reference *Chem. Eur. J.*, 2016, **22**, 4395.

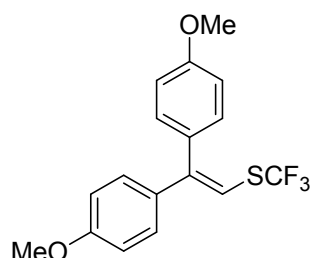

**(2,2-Bis(4-methoxyphenyl)vinyl)(trifluoromethyl)sulfane (3c)** (39.4 mg, 58%): Yellow oil. <sup>1</sup>H NMR (400 MHz, CDCl<sub>3</sub>):  $\delta$  ppm 7.11-7.04 (m, 4H), 6.87-6.83 (m, 2H), 6.77-6.73 (m, 2H), 6.43 (s, 1H), 3.76 (s, 3H), 3.72 (s, 3H). <sup>19</sup>F NMR (377 MHz, CDCl<sub>3</sub>):  $\delta$  ppm -42.83 (s, 3F). <sup>13</sup>C NMR (101 MHz, CDCl<sub>3</sub>):  $\delta$  ppm 159.9, 159.7, 146.6, 133.4, 130.8, 130.6, 128.9, 128.8 (q,  $J$  = 310.7 Hz), 113.9, 113.8, 109.1 (q,  $J$  = 3.2 Hz), 55.34, 55.28. IR (KBr):  $\nu$  1607, 1511, 1250, 1108, 1034, 835, 816, 584 cm<sup>-1</sup>. MS (EI)  $m/z$ : 340 [M]<sup>+</sup>. HRMS (EI)  $m/z$ : Calcd for C<sub>17</sub>H<sub>15</sub>F<sub>3</sub>O<sub>2</sub>S 340.0745, found [M]<sup>+</sup>: 340.0736. These data match those previously reported in reference *Chem. Eur. J.*, 2016, **22**, 4395.

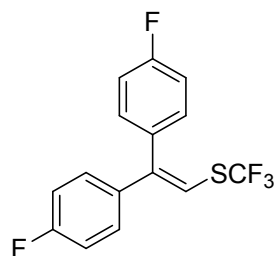

**(2,2-Bis(4-fluorophenyl)vinyl)(trifluoromethyl)sulfane (3d)** (42.3 mg, 67%): Yellow oil. <sup>1</sup>H NMR (400 MHz, CDCl<sub>3</sub>):  $\delta$  ppm 7.13-7.09 (m, 4H), 7.05-7.01 (m, 2H), 6.96-6.91 (m, 2H), 6.55 (s, 1H). <sup>19</sup>F NMR (377 MHz, CDCl<sub>3</sub>):  $\delta$  ppm -42.56 (s, 3F), -112.09--112.17 (m, 1F), -112.87--112.94 (m, 1F). <sup>13</sup>C NMR (101 MHz, CDCl<sub>3</sub>):  $\delta$  ppm 161.9 (d,  $J$  = 249.0 Hz), 161.7 (d,  $J$  = 248.9 Hz), 143.6, 135.3 (d,  $J$  = 3.3 Hz), 132.8 (d,  $J$  = 3.4 Hz), 130.2 (d,  $J$  = 8.3 Hz), 128.6 (q,  $J$  = 309.1 Hz), 128.1 (d,  $J$  = 8.2 Hz), 114.8 (d,  $J$  = 31.2 Hz), 114.6 (d,  $J$  = 31.3 Hz), 111.2. IR (KBr):  $\nu$  1603, 1511, 1233, 1160, 1111, 841, 733, 576 cm<sup>-1</sup>. MS (EI)  $m/z$ : 316 [M]<sup>+</sup>. HRMS (EI)  $m/z$ : Calcd for C<sub>15</sub>H<sub>9</sub>F<sub>5</sub>S 316.0345, found [M]<sup>+</sup>: 316.0334. These data match those previously reported in reference *Chem. Eur. J.*, 2016, **22**, 4395.

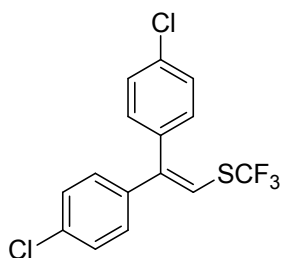

**(2,2-Bis(4-chlorophenyl)vinyl)(trifluoromethyl)sulfane (3e)** (39.8 mg, 57%): Yellow oil.  $^1\text{H}$  NMR (400 MHz,  $\text{CDCl}_3$ ):  $\delta$  ppm 7.32 (d,  $J = 8.4$  Hz, 2H), 7.21 (d,  $J = 8.6$  Hz, 2H), 7.07 (d,  $J = 7.6$  Hz, 4H), 6.61 (s, 1H).  $^{19}\text{F}$  NMR (377 MHz,  $\text{CDCl}_3$ ):  $\delta$  ppm -42.42 (s, 3F).  $^{13}\text{C}$  NMR (101 MHz,  $\text{CDCl}_3$ ):  $\delta$  ppm 144.1, 138.4, 136.0, 134.9, 134.6, 130.8, 129.6 (q,  $J = 309.1$  Hz), 129.1, 128.8, 128.6, 113.3 (q,  $J = 3.4$  Hz). IR (KBr):  $\nu$  2254, 1493, 1114, 1015, 903, 724, 650, 520  $\text{cm}^{-1}$ . MS (EI)  $m/z$ : 348  $[\text{M}]^+$ . HRMS (EI)  $m/z$ : Calcd for  $\text{C}_{15}\text{H}_9\text{Cl}_2\text{F}_3\text{S}$  347.9754, found  $[\text{M}]^+$ : 347.9760. These data matched those previously reported in reference *Chem. Eur. J.*, 2016, **22**, 4395.

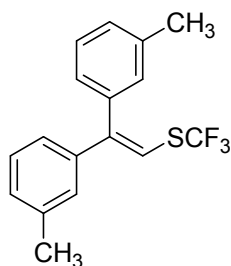

**(2,2-Di-m-tolylvinyl)(trifluoromethyl)sulfane (3f)** (32.7 mg, 53%): Yellow oil.  $^1\text{H}$  NMR (400 MHz,  $\text{CDCl}_3$ ):  $\delta$  ppm 7.20 (t,  $J = 7.9$  Hz, 1H), 7.09 (t,  $J = 7.4$  Hz, 2H), 7.01 (d,  $J = 7.6$  Hz, 1H), 6.97 (s, 1H), 6.92 (d,  $J = 7.4$  Hz, 3H), 6.56 (s, 1H), 2.26 (s, 3H), 2.22 (s, 3H).  $^{19}\text{F}$  NMR (377 MHz,  $\text{CDCl}_3$ ):  $\delta$  ppm -42.62 (s, 3F).  $^{13}\text{C}$  NMR (101 MHz,  $\text{CDCl}_3$ ):  $\delta$  ppm 146.7, 140.5, 138.4, 138.21, 138.18, 129.9, 129.6 (q,  $J = 309.1$  Hz), 129.4, 129.2, 128.5, 128.4, 128.1, 126.5, 124.7, 111.8 (q,  $J = 3.4$  Hz), 21.48, 21.46. IR (KBr):  $\nu$  1603, 1487, 1158, 1107, 838, 778, 758, 698  $\text{cm}^{-1}$ . MS (EI)  $m/z$ : 308  $[\text{M}]^+$ . HRMS (EI)  $m/z$ : Calcd for  $\text{C}_{17}\text{H}_{15}\text{F}_3\text{S}$  308.0847, found  $[\text{M}]^+$ : 308.0840. These data matched those previously reported in reference *Chem. Eur. J.*, 2016, **22**, 4395.

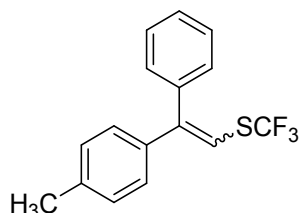

**(2-Phenyl-2-(p-tolyl)vinyl)(trifluoromethyl)sulfane (3g) (E/Z = 1:1)** (36.5 mg, 62%): Yellow oil.  $^1\text{H}$  NMR (400 MHz,  $\text{CDCl}_3$ ):  $\delta$  ppm 7.39-7.32 (m, 1.5H), 7.28-7.26 (m, 1.5H), 7.23-7.18 (m, 3H), 7.13-7.08 (m, 3H), 6.65 (s, 1H), 2.36 (s, 1.5H), 2.31 (s, 1.5H).  $^{19}\text{F}$  NMR (377 MHz,  $\text{CDCl}_3$ ):  $\delta$  ppm -42.58 (s, 1.5F), -42.58 (s, 1.5F).  $^{13}\text{C}$

NMR (101 MHz, CDCl<sub>3</sub>):  $\delta$  ppm 145.7, 145.4, 139.5, 137.5, 137.3, 137.2, 136.5, 134.1, 128.82 (q,  $J = 309.1$  Hz), 128.32, 128.27, 128.2, 128.1, 127.5, 127.4, 127.2, 126.4, 126.3, 110.6 (q,  $J = 3.3$  Hz), 110.0 (q,  $J = 3.3$  Hz), 20.3, 20.1. IR (KBr):  $\nu$  3055, 1422, 1265, 898, 731, 703 cm<sup>-1</sup>. MS (EI)  $m/z$ : 294 [M]<sup>+</sup>. HRMS (EI)  $m/z$ : Calcd for C<sub>16</sub>H<sub>13</sub>F<sub>3</sub>S 294.0690, found [M]<sup>+</sup>: 294.0697.

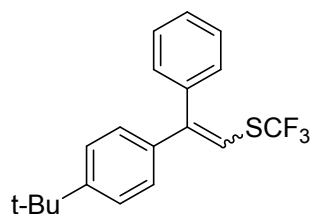

**(2-(4-(Tert-butyl)phenyl)-2-phenylvinyl)(trifluoromethyl)sulfane (3h) (E/Z = 1:1)** (42.4 mg, 63%): Yellow oil. <sup>1</sup>H NMR (400 MHz, CDCl<sub>3</sub>):  $\delta$  ppm 7.41-7.36 (m, 2.5H), 7.34-7.30 (m, 1.5H), 7.26 (s, 1.5H), 7.24-7.20 (m, 2H), 7.17-7.12 (m, 1.5H), 6.68 (s, 0.5H), 6.64 (s, 0.5H), 1.34 (s, 4.5H), 1.30 (s, 4.5H). <sup>19</sup>F NMR (377 MHz, CDCl<sub>3</sub>):  $\delta$  ppm -42.58 (s, 1.5F), -42.64 (s, 1.5F). <sup>13</sup>C NMR (101 MHz, CDCl<sub>3</sub>):  $\delta$  ppm 150.5, 145.6, 145.2, 139.6, 137.2, 136.3, 134.0, 128.9 (q,  $J = 309.1$  Hz), 128.8 (q,  $J = 309.1$  Hz), 128.3, 128.0, 127.5, 127.39, 127.35, 126.5, 126.0, 124.4, 124.3, 110.7 (q,  $J = 3.3$  Hz), 110.1 (q,  $J = 3.2$  Hz), 33.6, 33.5, 30.2, 30.1. IR (KBr):  $\nu$  2964, 1150, 1105, 937, 842, 809, 754, 700, 630 cm<sup>-1</sup>. MS (EI)  $m/z$ : 336 [M]<sup>+</sup>. HRMS (EI)  $m/z$ : Calcd for C<sub>19</sub>H<sub>19</sub>F<sub>3</sub>S 336.1160, found [M]<sup>+</sup>: 336.1156.

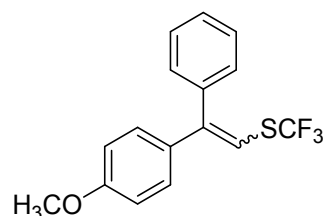

**(2-(4-Methoxyphenyl)-2-phenylvinyl)(trifluoromethyl)sulfane (3i) (E/Z = 1:1)** (42.2 mg, 68%): Yellow oil. <sup>1</sup>H NMR (400 MHz, CDCl<sub>3</sub>):  $\delta$  ppm 7.34-7.27 (m, 1.5 H), 7.22-7.21 (m, 1.5H), 7.16-7.11 (m, 2H), 7.07 (t,  $J = 8.5$  Hz, 2H), 6.85 (d,  $J = 5.6$  Hz, 0.5H), 6.83 (s, 0.5H), 6.76 (s, 0.5H), 6.73 (s, 0.5H), 6.53 (s, 0.5H), 6.50 (s, 0.5H), 3.74 (s, 1.5H), 3.70 (s, 1.5H). <sup>19</sup>F NMR (377 MHz, CDCl<sub>3</sub>):  $\delta$  ppm -42.68 (s, 1.5F), -42.73 (s, 1.5F). <sup>13</sup>C NMR (101 MHz, CDCl<sub>3</sub>):  $\delta$  ppm 158.8, 158.7, 145.8, 145.2, 139.7, 137.3, 131.9, 129.7, 129.3, 128.8 (q,  $J = 309.7$  Hz), 128.4, 127.7, 127.5, 127.44, 127.39, 127.3, 126.5, 112.9, 112.8, 110.2 (q,  $J = 3.2$  Hz), 108.6 (q,  $J = 3.2$  Hz), 54.3, 54.2. IR (KBr):  $\nu$  1607, 1510, 1251, 1166, 1108, 1033, 839, 735, 699 cm<sup>-1</sup>. MS (EI)  $m/z$ : 310 [M]<sup>+</sup>. HRMS (EI)  $m/z$ : Calcd for C<sub>16</sub>H<sub>13</sub>F<sub>3</sub>OS 310.0639, found [M]<sup>+</sup>: 310.0636.



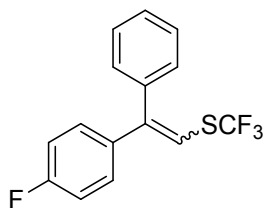

**(2-(4-Fluorophenyl)-2-phenylvinyl)(trifluoromethyl)sulfane (3j) (E/Z = 1:1)** (30.4 mg, 51%): Yellow oil. <sup>1</sup>H NMR (400 MHz, CDCl<sub>3</sub>) : δ ppm 7.36-7.29 (m, 1.5H), 7.25-7.23 (m, 1.5H), 7.16-7.11 (m, 4H), 7.03 (t, *J* = 8.6 Hz, 1H), 6.92 (t, *J* = 8.6 Hz, 1H), 6.61 (s, 0.5H), 6.55 (s, 0.5H). <sup>19</sup>F NMR (377 MHz, CDCl<sub>3</sub>): δ ppm -42.51 (s, 1.5F), -42.64 (s, 1.5F), -112.40--112.47 (m, 0.5F), -113.19--113.26 (m, 0.5F). <sup>13</sup>C NMR (101 MHz, CDCl<sub>3</sub>): δ ppm 161.8 (d, *J* = 248.7 Hz), 161.6 (d, *J* = 248.6 Hz), 139.1, 135.5 (d, *J* = 3.3 Hz), 132.9 (d, *J* = 3.4 Hz), 136.9, 130.3 (d, *J* = 8.2 Hz), 128.7 (q, *J* = 308.7 Hz), 128.6 (q, *J* = 308.4 Hz), 128.3, 128.2, 128.1, 127.7, 127.52, 127.49, 114.7 (d, *J* = 30.8 Hz), 114.5 (d, *J* = 30.8 Hz), 111.4 (q, *J* = 3.2 Hz), 110.9 (q, *J* = 3.2 Hz). IR (KBr): ν 2924, 1603, 1508, 444, 1234, 1165, 1111, 844, 756 cm<sup>-1</sup>. MS (EI) m/z: 298 [M]<sup>+</sup>. HRMS (EI) m/z: Calcd for C<sub>15</sub>H<sub>10</sub>F<sub>4</sub>S 298.0439, found [M]<sup>+</sup>: 298.0447.

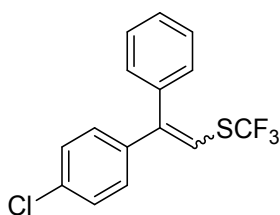

**2-(4-Chlorophenyl)-2-phenylvinyl(trifluoromethyl)sulfane (3k) (E/Z = 1:1)** (29.6 mg, 47%): Yellow oil. <sup>1</sup>H NMR (400 MHz, CDCl<sub>3</sub>): δ ppm 7.41-7.34 (m, 2.5H), 7.28-7.27 (m, 1.5H), 7.24-7.16 (m, 3H), 7.13 (d, *J* = 8.3 Hz, 2H), 6.70 (s, 0.5H), 6.68 (s, 0.5H). <sup>19</sup>F NMR (377 MHz, CDCl<sub>3</sub>): δ ppm -42.42 (s, 1.5F), -42.48 (s, 1.5F). <sup>13</sup>C NMR (101 MHz, CDCl<sub>3</sub>): δ ppm 144.5, 143.9, 138.9, 137.6, 136.6, 135.4, 133.5, 133.3, 129.8, 128.7 (q, *J* = 309.1 Hz), 128.6 (q, *J* = 309.1 Hz), 128.2, 127.9, 127.7, 127.61, 127.58, 127.5, 127.3, 126.3, 111.7 (q, *J* = 3.3 Hz), 111.5 (q, *J* = 3.3 Hz). IR (KBr): ν 1489, 1265, 1167, 1107, 1015, 935, 755, 701 cm<sup>-1</sup>. MS (EI) m/z: 314 [M]<sup>+</sup>. HRMS (EI) m/z: Calcd for C<sub>15</sub>H<sub>10</sub>ClF<sub>3</sub>S 314.0144, found [M]<sup>+</sup>: 314.0142.

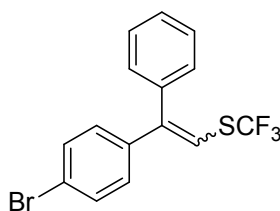

**(2-(4-Bromophenyl)-2-phenylvinyl)(trifluoromethyl)sulfane (3l) (E/Z = 1:1)** (37.3 mg, 52%): Yellow oil. <sup>1</sup>H NMR (600 MHz, CDCl<sub>3</sub>): δ ppm 7.65-7.64 (m, 1H), 7.54-7.49 (m, 2.5H), 7.43-7.41 (m, 1.5H), 7.32-7.30 (m, 2H), 7.22-7.20 (m, 2H), 6.84 (s,

0.5H), 6.83 (s, 0.5H).  $^{19}\text{F}$  NMR (377 MHz,  $\text{CDCl}_3$ ):  $\delta$  ppm -42.49 (s, 1.5F), -42.55 (s, 1.5F).  $^{13}\text{C}$  NMR (151 MHz,  $\text{CDCl}_3$ ):  $\delta$  ppm 145.7, 145.1, 139.9, 139.3, 137.6, 137.0, 132.0, 131.7, 131.2, 129.81 (q,  $J = 309.1$  Hz), 129.78 (q,  $J = 308.0$  Hz), 129.4, 129.0, 128.9, 128.8, 128.70, 128.68, 127.5, 122.9, 122.7, 113.0 (q,  $J = 3.3$  Hz), 112.7 (q,  $J = 3.3$  Hz). IR (KBr):  $\nu$  1494, 1167, 1109, 1011, 807, 756, 700  $\text{cm}^{-1}$ . MS (EI)  $m/z$ : 358  $[\text{M}]^+$ . HRMS (EI)  $m/z$ : Calcd for  $\text{C}_{15}\text{H}_{10}\text{BrF}_3\text{S}$  357.9639, found  $[\text{M}]^+$ : 357.9637.

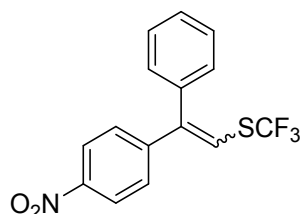

**(2-(4-Nitrophenyl)-2-phenylvinyl) (trifluoromethyl)sulfane (3m) (E/Z = 1:1)** (36.4 mg, 56%): Yellow oil.  $^1\text{H}$  NMR (600 MHz,  $\text{CDCl}_3$ ):  $\delta$  ppm 8.32-8.31 (m, 1H), 8.21-8.19 (m, 1H), 7.51-7.45 (m, 2.5H), 7.42 (d,  $J = 8.9$  Hz, 1H), 7.39-7.37 (m, 1.5H), 7.24-7.22 (m, 2H), 6.93 (s, 0.5H), 6.85 (s, 0.5H).  $^{19}\text{F}$  NMR (377 MHz,  $\text{CDCl}_3$ ):  $\delta$  ppm -42.34 (s, 1.5F), -42.35 (s, 1.5F).  $^{13}\text{C}$  NMR (151 MHz,  $\text{CDCl}_3$ ):  $\delta$  ppm 147.7, 147.4, 146.1, 144.9, 144.7, 142.9, 139.2, 136.8, 130.5, 129.5 (q,  $J = 308.0$  Hz), 129.4 (q,  $J = 308.0$  Hz), 129.23, 129.15, 129.1, 129.0, 128.8, 127.9, 127.3, 124.0, 123.8, 117.1 (q,  $J = 3.4$  Hz), 114.1 (q,  $J = 3.3$  Hz). IR (KBr):  $\nu$  1521, 1349, 1265, 1111, 853, 733, 702  $\text{cm}^{-1}$ . MS (EI)  $m/z$ : 325  $[\text{M}]^+$ . HRMS (EI)  $m/z$ : Calcd for  $\text{C}_{15}\text{H}_{10}\text{F}_3\text{NO}_2\text{S}$  325.0384, found  $[\text{M}]^+$ : 325.0378.

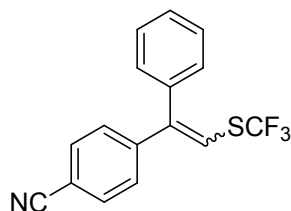

**4-(1-Phenyl-2-((trifluoromethyl)thio)vinyl)benzonitrile (3n) (E/Z = 1:1)** (27.4 mg, 45%): Yellow oil.  $^1\text{H}$  NMR (600 MHz,  $\text{CDCl}_3$ ):  $\delta$  ppm 7.75 (d,  $J = 8.2$  Hz, 1H), 7.63 (d,  $J = 8.4$  Hz, 1H), 7.50-7.46 (m, 1.5H), 7.40-7.37 (m, 3.5H), 7.24-7.22 (m, 2H), 6.89 (s, 0.5H), 6.83 (s, 0.5H).  $^{19}\text{F}$  NMR (376 MHz,  $\text{CDCl}_3$ ):  $\delta$  ppm -42.34 (s, 1.5F), -42.37 (s, 1.5F).  $^{13}\text{C}$  NMR (151 MHz,  $\text{CDCl}_3$ ):  $\delta$  ppm 145.3, 144.3, 143.5, 142.8, 139.3, 136.8, 132.5, 132.3, 130.3, 129.5 (q,  $J = 308.4$  Hz), 129.4 (q,  $J = 308.0$  Hz), 129.19, 129.15, 129.1, 129.0, 128.8, 127.8, 127.4, 118.6, 118.4, 116.2 (q,  $J = 3.5$  Hz), 113.8 (q,  $J = 3.4$  Hz), 112.5, 111.8. IR (KBr):  $\nu$  3030, 1103, 803, 755, 696, 542  $\text{cm}^{-1}$ . MS (EI)  $m/z$ : 305  $[\text{M}]^+$ . HRMS (EI)  $m/z$ : Calcd for  $\text{C}_{16}\text{H}_{10}\text{F}_3\text{NS}$  305.0486, found  $[\text{M}]^+$ : 305.0481.

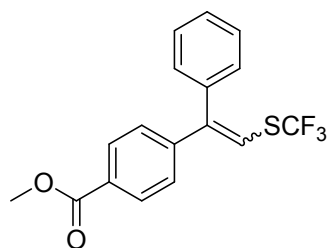

**Methyl 4-(1-phenyl-2-((trifluoromethyl)thio)vinyl)benzoate (3o) (E/Z = 1:1)** (43.2 mg, 64%): Yellow oil.  $^1\text{H}$  NMR (600 MHz,  $\text{CDCl}_3$ ):  $\delta$  ppm 8.15 (d,  $J = 1.8$  Hz, 0.5H), 8.14 (d,  $J = 1.8$  Hz, 0.5H), 8.03 (d,  $J = 1.8$  Hz, 0.5H), 8.02 (d,  $J = 1.8$  Hz, 0.5H), 7.49-7.43 (m, 1.5H), 7.36-7.34 (m, 3.5H), 7.27-7.24 (m, 2H), 6.88 (s, 0.5H), 6.81 (s, 0.5H), 3.97 (s, 1.5H), 3.95 (s, 1.5H).  $^{19}\text{F}$  NMR (377 MHz,  $\text{CDCl}_3$ ):  $\delta$  ppm -42.46 (s, 1.5F), -42.49 (s, 1.5F).  $^{13}\text{C}$  NMR (151 MHz,  $\text{CDCl}_3$ ):  $\delta$  ppm 166.59, 166.55, 145.8, 144.7, 144.4, 142.7, 139.7, 137.5, 130.3, 130.0, 129.82, 129.78, 129.70 (q,  $J = 308.0$  Hz), 129.67 (q,  $J = 308.0$  Hz), 129.5, 129.3, 128.9, 128.68, 128.65, 127.4, 127.3, 114.8 (q,  $J = 3.3$  Hz), 113.1 (q,  $J = 3.3$  Hz), 52.21, 52.15. IR (KBr):  $\nu$  1721, 1436, 1274, 1166, 1099, 1019, 755, 699  $\text{cm}^{-1}$ . MS (EI)  $m/z$ : 338  $[\text{M}]^+$ . HRMS (EI)  $m/z$ : Calcd for  $\text{C}_{17}\text{H}_{13}\text{F}_3\text{O}_2\text{S}$  338.0588, found  $[\text{M}]^+$ : 338.0585.

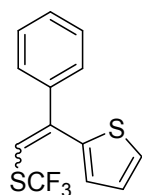

**2-(1-Phenyl-2-((trifluoromethyl)thio)vinyl)thiophene (3P) (E/Z = 3:2)** (40.0 mg, 54%): Yellow oil.  $^1\text{H}$  NMR (400 MHz,  $\text{CDCl}_3$ ):  $\delta$  ppm 7.30-7.27 (m, 2.2H), 7.22 (s, 2.2H), 7.17-7.15 (m, 1.2H), 7.08 (t,  $J = 11.0$  Hz, 0.8H), 6.94-6.92 (m, 1H), 6.81-6.79 (m, 0.6H), 6.62 (d,  $J = 3.3$  Hz, 0.6H), 6.40 (s, 0.4H).  $^{19}\text{F}$  NMR (377 MHz,  $\text{CDCl}_3$ ):  $\delta$  ppm -42.48 (s, 1.8F), -42.63 (s, 1.2F).  $^{13}\text{C}$  NMR (101 MHz,  $\text{CDCl}_3$ ):  $\delta$  ppm 144.1, 141.4, 141.0, 139.8, 139.2, 137.4, 129.8 (q,  $J = 309.1$  Hz), 129.7 (q,  $J = 309.1$  Hz), 129.7, 129.2, 129.0, 128.8, 128.7, 128.5, 128.1, 127.70, 127.66, 127.1, 127.0, 126.3, 111.7 (q,  $J = 3.4$  Hz), 109.2 (q,  $J = 3.2$  Hz). IR (KBr):  $\nu$  1237, 1162, 1102, 847, 803, 756, 695, 615  $\text{cm}^{-1}$ . MS (EI)  $m/z$ : 286  $[\text{M}]^+$ . HRMS (EI)  $m/z$ : Calcd for  $\text{C}_{13}\text{H}_9\text{F}_3\text{S}_2$  286.0098, found  $[\text{M}]^+$ : 286.0096.

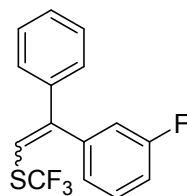

**(2-(3-Fluorophenyl)-2-phenylvinyl)(trifluoromethyl)sulfane (3q) (E/Z = 1:1)** (39.8 mg, 58%): Yellow oil.  $^1\text{H}$  NMR (400 MHz,  $\text{CDCl}_3$ ):  $\delta$  ppm 7.38-7.30 (m, 2H), 7.27 (t,  $J = 6.4$  Hz, 1.5H), 7.20-7.16 (m, 2.5H), 7.05-6.96 (m, 1.5H), 6.91 (t,  $J = 8.4$  Hz, 1.5H), 6.73 (s, 0.5H), 6.72 (s, 0.5H).  $^{19}\text{F}$  NMR (377 MHz,  $\text{CDCl}_3$ ):  $\delta$  ppm -42.47 (s, 3F), -

111.68--111.75 (m, 0.5F), -112.41--112.45 (m, 0.5F).  $^{13}\text{C}$  NMR (101 MHz,  $\text{CDCl}_3$ ):  $\delta$  ppm 161.8 (d,  $J = 246.6$  Hz), 144.2, 143.7, 141.3 (d,  $J = 7.5$  Hz), 139.1 (d,  $J = 7.6$  Hz), 138.7, 136.5, 129.2 (d,  $J = 8.3$  Hz), 128.9 (d,  $J = 8.3$  Hz), 128.7 (q,  $J = 309.1$  Hz), 128.2, 127.8, 127.5, 126.3, 124.1 (d,  $J = 3.0$  Hz), 122.0 (d,  $J = 2.8$  Hz), 115.4 (d,  $J = 21.8$  Hz), 114.4 (d,  $J = 42.4$  Hz), 114.2 (d,  $J = 42.7$  Hz), 113.3 (d,  $J = 22.5$  Hz), 112.6 (q,  $J = 3.3$  Hz), 111.8 (q,  $J = 3.3$  Hz). IR (KBr):  $\nu$  3030, 1160, 1103, 783, 803, 755, 694  $\text{cm}^{-1}$ . MS (EI)  $m/z$ : 298  $[\text{M}]^+$ . HRMS (EI)  $m/z$ : Calcd for  $\text{C}_{15}\text{H}_{10}\text{F}_4\text{S}$  298.0439, found  $[\text{M}]^+$ : 298.0438.

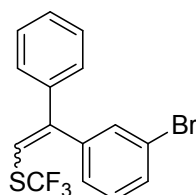

**(2-(3-Bromophenyl)-2-phenylvinyl)(trifluoromethyl)sulfane (3r) (E/Z = 1:1)**

$^1\text{H}$  NMR (600 MHz,  $\text{CDCl}_3$ ):  $\delta$  ppm 7.68-7.66 (m, 0.5H), 7.61-7.60 (m, 0.5H), 7.59-7.57 (m, 1.5H), 7.56-7.53 (m, 1H), 7.48-7.45 (m, 1.5H), 7.42-7.36 (m, 2.5H), 7.35-7.32 (m, 1H), 7.29 (t,  $J = 7.8$  Hz, 0.5H), 6.94 (s, 0.5H), 6.93 (s, 0.5H).  $^{19}\text{F}$  NMR (377 MHz,  $\text{CDCl}_3$ ):  $\delta$  ppm -42.45 (s, 1.5F), -42.47 (s, 1.5F).  $^{13}\text{C}$  NMR (151 MHz,  $\text{CDCl}_3$ ):  $\delta$  ppm 145.3, 144.8, 142.5, 140.3, 139.8, 137.6, 132.4, 131.8, 131.4, 130.5, 130.4, 130.1, 129.92 (q,  $J = 308.0$  Hz), 129.90 (q,  $J = 308.0$  Hz), 129.4, 129.02, 129.00, 128.8, 128.2, 127.5, 126.2, 123.04, 122.99, 114.0 (q,  $J = 3.3$  Hz), 113.2 (q,  $J = 3.3$  Hz). IR (KBr):  $\nu$  1540, 1167, 1149, 1103, 947, 774, 754, 699, 473  $\text{cm}^{-1}$ . MS (EI)  $m/z$ : 358  $[\text{M}]^+$ . HRMS (EI)  $m/z$ : Calcd for  $\text{C}_{15}\text{H}_{10}\text{BrF}_3\text{S}$  357.9639, found  $[\text{M}]^+$ : 357.9635.

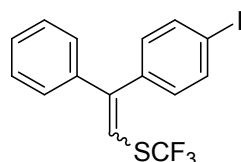

**(2-(4-Iodophenyl)-2-phenylvinyl)(trifluoromethyl)sulfane (3r) (E/Z = 1:1)** (48.7 mg, 60%): Yellow oil.  $^1\text{H}$  NMR (400 MHz,  $\text{CDCl}_3$ ):  $\delta$  ppm 7.65 (d,  $J = 8.0$  Hz, 1H), 7.54 (d,  $J = 8.2$  Hz, 1H), 7.34-7.28 (m, 1.5H), 7.23-7.21 (m, 1.5H), 7.13-7.09 (m, 2H), 6.87 (d,  $J = 8.1$  Hz, 2H), 6.61 (s, 1H).  $^{19}\text{F}$  NMR (377 MHz,  $\text{CDCl}_3$ ):  $\delta$  ppm -42.42 (s, 1.5F), -42.46 (s, 1.5F).  $^{13}\text{C}$  NMR (101 MHz,  $\text{CDCl}_3$ ):  $\delta$  ppm 144.5, 144.0, 138.73, 138.68, 136.8, 136.6, 136.43, 136.40, 130.2, 128.60 (q,  $J = 309.1$  Hz), 128.57 (q,  $J = 309.1$  Hz), 128.2, 128.1, 127.7, 127.6, 127.5, 126.4, 127.3, 111.9 (q,  $J = 3.4$  Hz), 111.5 (q,  $J = 3.3$  Hz), 93.6, 93.2. IR (KBr):  $\nu$  1485, 1390, 1168, 1111, 1007, 907, 808, 732  $\text{cm}^{-1}$ . MS (EI)  $m/z$ : 406  $[\text{M}]^+$ . HRMS (EI)  $m/z$ : Calcd for  $\text{C}_{15}\text{H}_{10}\text{F}_3\text{IS}$  405.9500, found  $[\text{M}]^+$ : 405.9489.

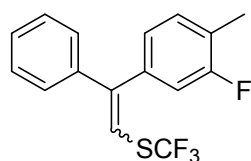

**(2-(3-Fluoro-4-methylphenyl)-2-phenylvinyl)(trifluoromethyl)sulfane (3t) (E/Z = 1:1)** (35.0 mg, 56%): Yellow oil.  $^1\text{H}$  NMR (400 MHz,  $\text{CDCl}_3$ ):  $\delta$  ppm 7.39-7.34 (m, 1.5H), 7.26 (d,  $J = 5.9$  Hz, 1.5H), 7.22-7.17 (m, 2.5H), 7.06 (t,  $J = 7.9$  Hz, 0.5H), 6.92-6.85 (m, 2H), 6.69 (d,  $J = 3.8$  Hz, 1H), 2.28 (s, 1.5H), 2.22 (s, 1.5H).  $^{19}\text{F}$  NMR (377 MHz,  $\text{CDCl}_3$ ):  $\delta$  ppm -42.55 (s, 3F), -116.13 (t,  $J = 8.9$  Hz, 0.5F), -116.79 (t,  $J = 9.4$  Hz, 0.5F).  $^{13}\text{C}$  NMR (101 MHz,  $\text{CDCl}_3$ ):  $\delta$  ppm 160.19 (d,  $J = 247.5$  Hz), 160.18 (d,  $J = 246.4$  Hz), 144.2 (d,  $J = 17.5$  Hz), 138.9, 138.7 (d,  $J = 7.5$  Hz), 136.6, 136.3 (d,  $J = 7.7$  Hz), 130.6 (d,  $J = 5.5$  Hz), 130.3 (d,  $J = 5.5$  Hz), 128.7 (q,  $J = 309.1$  Hz), 128.2, 127.7, 127.5 (d,  $J = 3.8$  Hz), 126.4, 124.5, 124.3, 124.1, 124.0, 123.90 (d,  $J = 3.4$  Hz), 123.86 (d,  $J = 3.4$  Hz), 121.5 (d,  $J = 3.2$  Hz), 114.0 (d,  $J = 208.1$  Hz), 113.8 (d,  $J = 208.7$  Hz), 13.4 (d,  $J = 3.4$  Hz), 13.2 (d,  $J = 3.4$  Hz). IR (KBr):  $\nu$  1505, 1161, 1102, 1002, 889, 804, 755, 697  $\text{cm}^{-1}$ . MS (EI)  $m/z$ : 312  $[\text{M}]^+$ . HRMS (EI)  $m/z$ : Calcd for  $\text{C}_{16}\text{H}_{12}\text{F}_4\text{S}$  312.0596, found  $[\text{M}]^+$ : 312.0590.

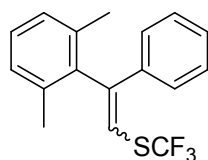

**(2-(2,6-Dimethylphenyl)-2-phenylvinyl)(trifluoromethyl)sulfane (3u) (E/Z = 1:0.45)** (13.0 mg, 21%): colorless oil.  $^1\text{H}$  NMR (400 MHz,  $\text{CDCl}_3$ ):  $\delta$  ppm 7.34-7.28 (m, 3.0H), 7.24-7.21 (m, 2.0H), 7.17 (d,  $J = 5.4$  Hz, 0.8H), 7.12 (d,  $J = 7.5$  Hz, 1.5H), 7.07 (d,  $J = 7.5$  Hz, 0.7H), 6.95 (s, 0.7H), 6.26 (s, 0.3H), 2.18 (s, 1.9H), 2.12 (s, 4.1H).  $^{19}\text{F}$  NMR (377 MHz,  $\text{CDCl}_3$ ):  $\delta$  ppm -41.85 (s, 2.1F), -42.91 (s, 0.9F).  $^{13}\text{C}$  NMR (101 MHz,  $\text{CDCl}_3$ ):  $\delta$  ppm 144.6, 142.8, 137.21, 137.17, 136.6, 136.5, 136.1, 129.1 (q,  $J = 309.1$  Hz), 129.0 (q,  $J = 309.1$  Hz), 128.8, 128.44, 128.41, 128.39, 128.3, 127.9, 127.8, 125.6, 113.4 (q,  $J = 3.3$  Hz), 112.8 (q,  $J = 3.3$  Hz), 20.4, 19.5. IR (KBr):  $\nu$  3326, 1380, 1088, 1046, 880, 635  $\text{cm}^{-1}$ . MS (EI)  $m/z$ : 308  $[\text{M}]^+$ . HRMS (EI)  $m/z$ : Calcd for  $\text{C}_{17}\text{H}_{15}\text{F}_3\text{S}$  308.0847, found  $[\text{M}]^+$ : 308.0836.

## 5. Mechanistic Investigation

### Radical trapping experiments

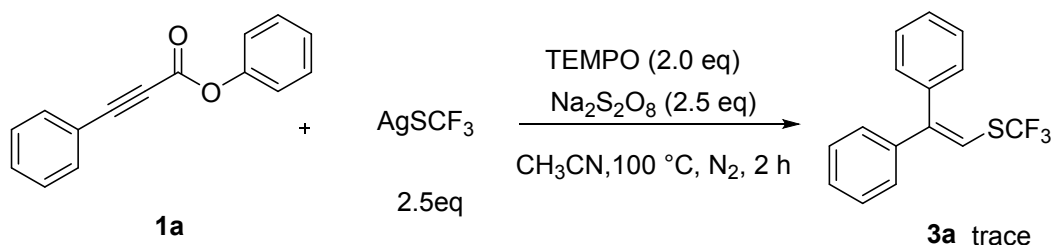

### The experimental procedures for radical capture with TEMPO:

A mixture of **1a** (44.4 mg, 0.2 mmol, 1.0 equiv),  $\text{AgSCF}_3$  (104.0 mg, 0.50 mmol, 2.5 equiv), TEMPO (62.5 mg, 0.40 mmol, 2.0 equiv) and  $\text{Na}_2\text{S}_2\text{O}_8$  (119.2 mg, 0.50 mmol, 2.5 equiv) was added tube that was sealed with a septum, evacuated, and backfilled with nitrogen three times.  $\text{CH}_3\text{CN}$  (4.0 mL) was added to the tube. Then, the tube was

stirred at 100 °C for 2 h. Only trace of the desired product **3a** was detected by  $^{19}\text{F}$  NMR.

## The deuterium labeling experiments

### The deuterium labeling experiment in $\text{CH}_3\text{CN}/\text{D}_2\text{O}$

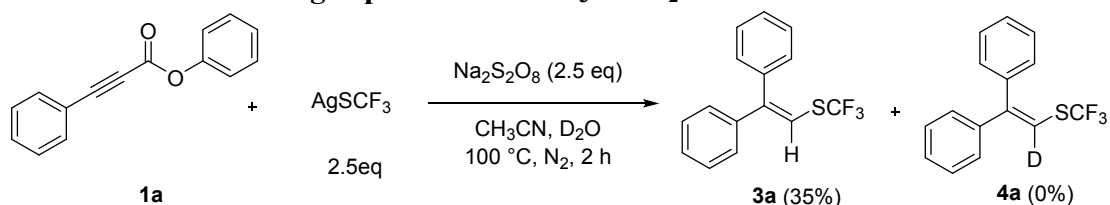

A mixture of **1** (44.4 mg, 0.2 mmol, 1.0 equiv),  $\text{AgSCF}_3$  (104.0 mg, 0.50 mmol, 2.5 equiv) and  $\text{Na}_2\text{S}_2\text{O}_8$  (119.2 mg, 0.50 mmol, 2.5 equiv) was added tube that was sealed with a septum, evacuated, and backfilled with nitrogen three times. The mixture of  $\text{CH}_3\text{CN}$  (2.0 mL) and  $\text{D}_2\text{O}$  (2.0 mL) was added to the tube. Then, the tube was stirred at  $100\text{ }^\circ\text{C}$  for 2 h. Product **3a** was formed in 35% yield (detected by  $^{19}\text{F}$  NMR), and no deuterated product **4a** was detected by  $^{19}\text{F}$  NMR.

### The deuterium labeling experiment in $\text{CD}_3\text{CN}/\text{CH}_3\text{CN}$

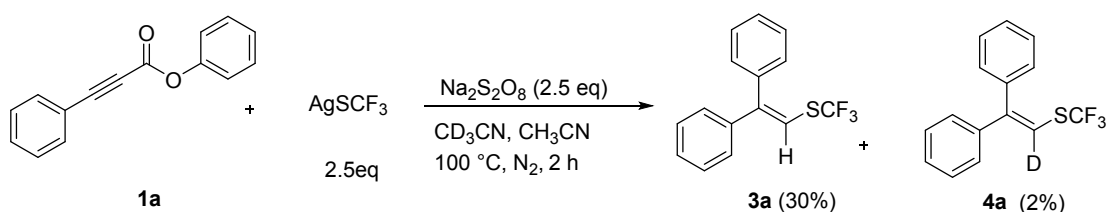

A mixture of **1** (44.4 mg, 0.2 mmol, 1.0 equiv),  $\text{AgSCF}_3$  (104.0 mg, 0.50 mmol, 2.5 equiv) and  $\text{Na}_2\text{S}_2\text{O}_8$  (119.2 mg, 0.50 mmol, 2.5 equiv) was added tube that was sealed with a septum, evacuated, and backfilled with nitrogen three times. The mixture of  $\text{CD}_3\text{CN}$  (2.0 mL) and  $\text{CH}_3\text{CN}$  (2.0 mL) was added to the tube. Then, the tube was stirred at  $100\text{ }^\circ\text{C}$  for 2 h. Product **3a** was formed in 30% yield (detected by  $^{19}\text{F}$  NMR), and only trace of deuterated product **4a** (2%) was detected by  $^{19}\text{F}$  NMR.

### The deuterium labeling experiment in $\text{CD}_3\text{CN}$

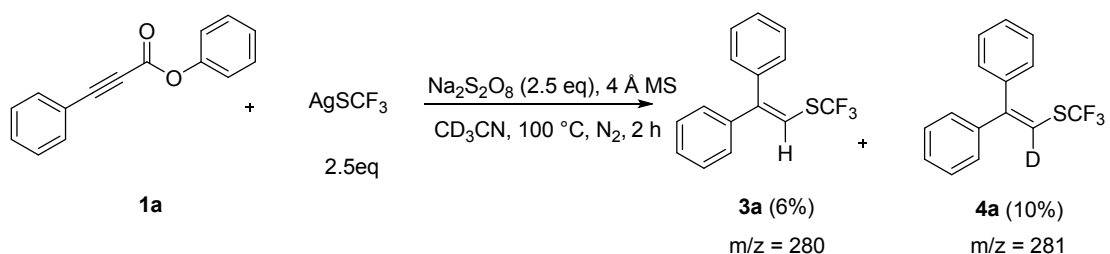

A mixture of **1** (44.4 mg, 0.2 mmol, 1.0 equiv),  $\text{AgSCF}_3$  (104.0 mg, 0.50 mmol, 2.5 equiv) and  $\text{Na}_2\text{S}_2\text{O}_8$  (119.2 mg, 0.50 mmol, 2.5 equiv) was added tube that was sealed with a septum, evacuated, and backfilled with nitrogen three times.  $\text{CD}_3\text{CN}$  (4.0 mL) was added to the tube. Then, the tube was stirred at  $100\text{ }^\circ\text{C}$  for 2 h. Product **3a** was

formed in 6% yield (detected by  $^{19}\text{F}$  NMR). The deuterated product **4a** (10%) was detected by  $^{19}\text{F}$  NMR and GC-MS.

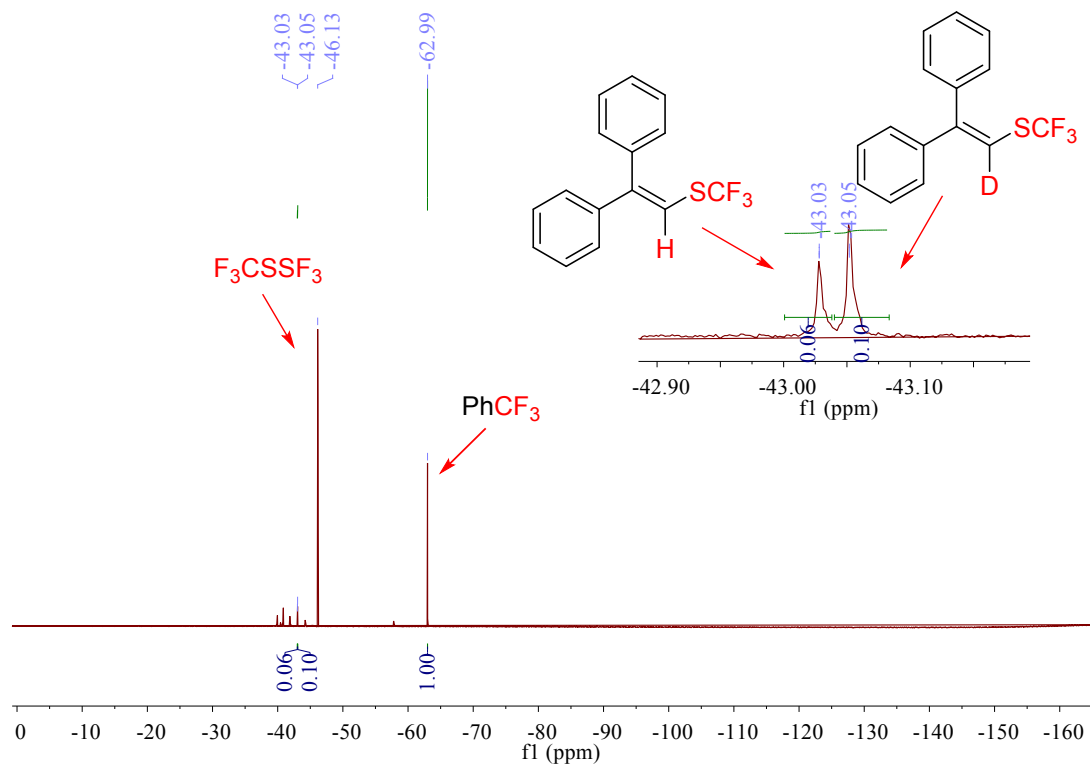

Spectrum

Line#:1 R.Time:10.380(Scan#:1437)

MassPeaks:465

RawMode:Single 10.380(1437) BasePeak:281(899480)

BG Mode:None Group 1 - Event 1 Scan

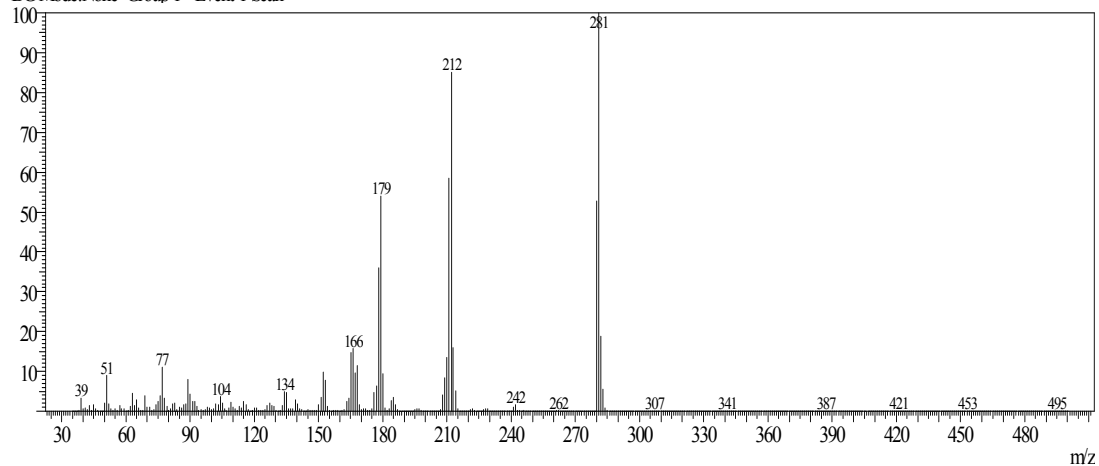

## 6. Copies of $^1\text{H}$ , $^{19}\text{F}$ , and $^{13}\text{C}$ NMR Spectra for the Products.

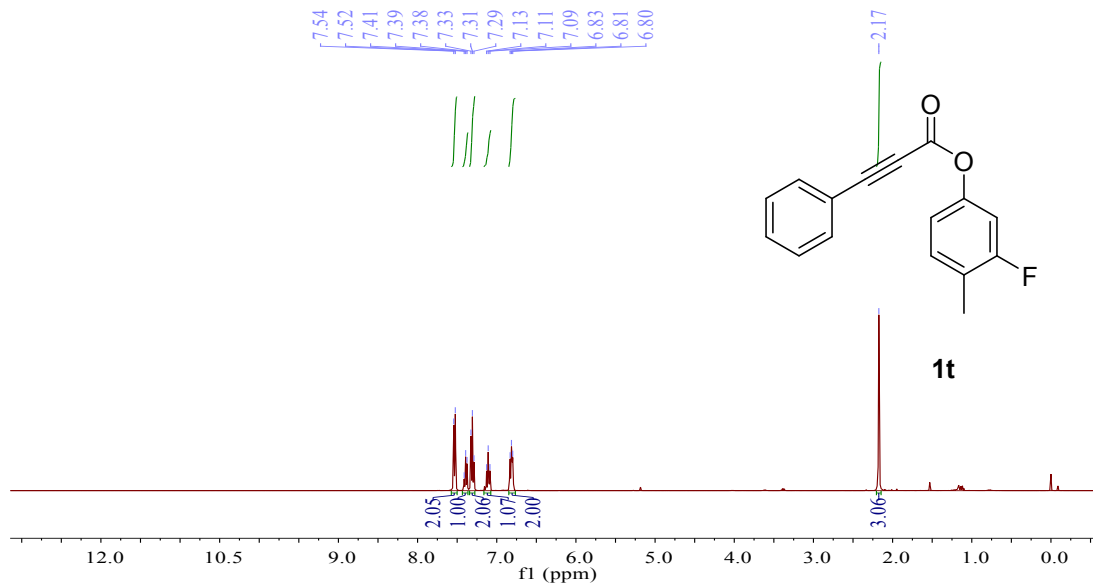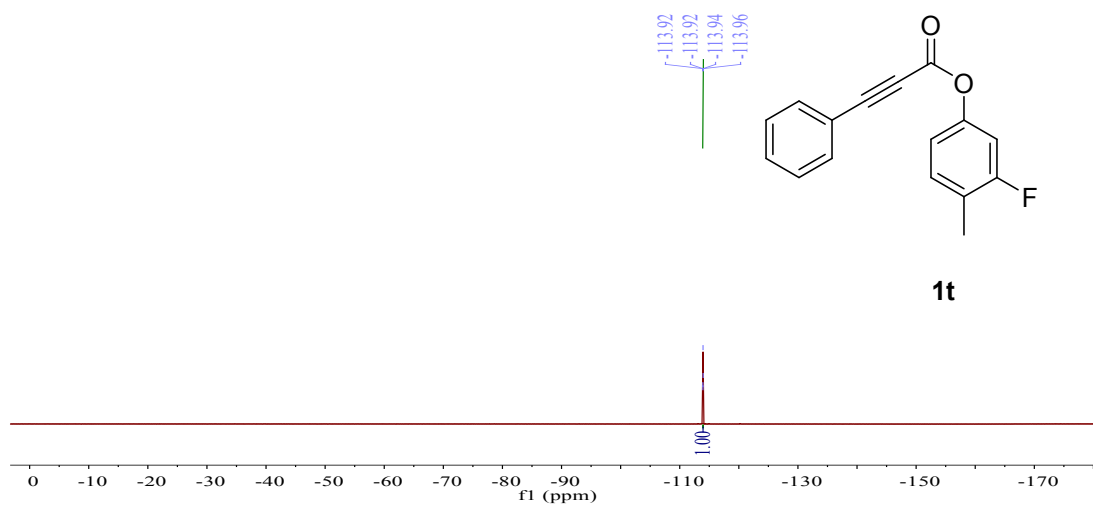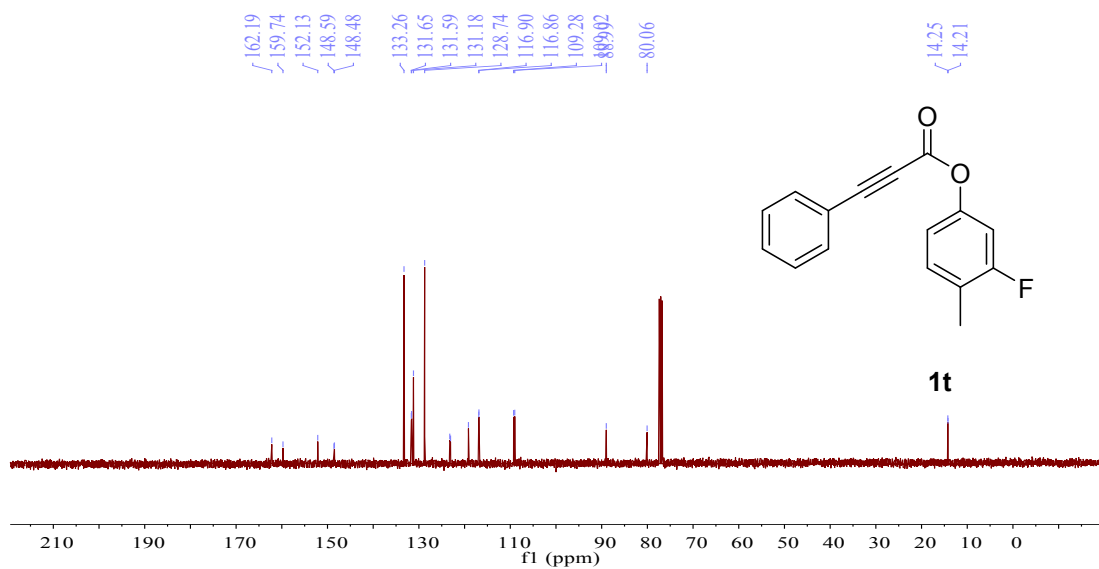



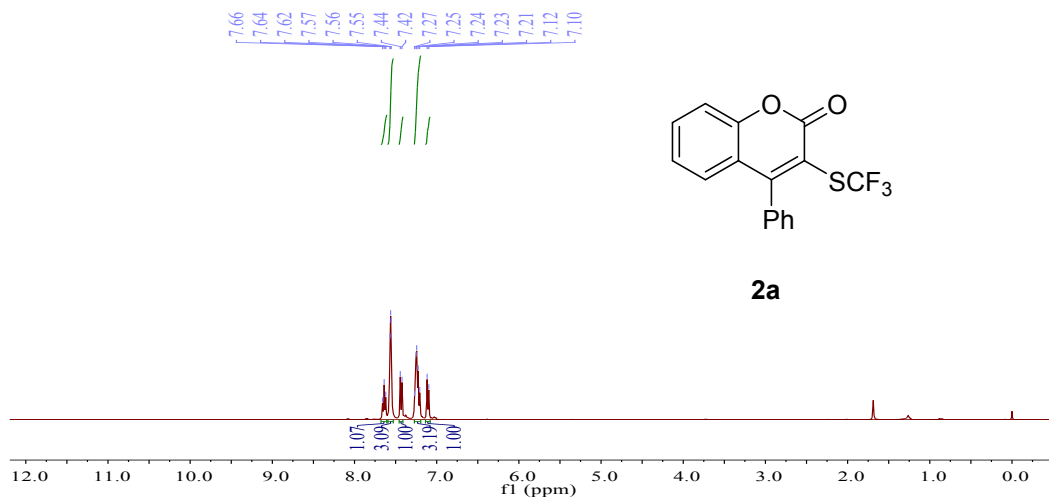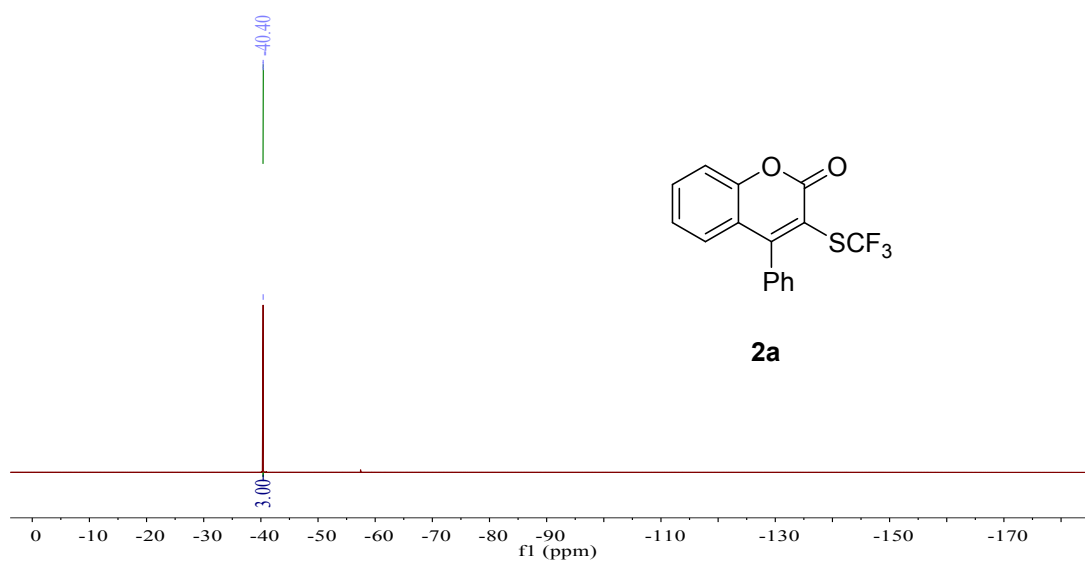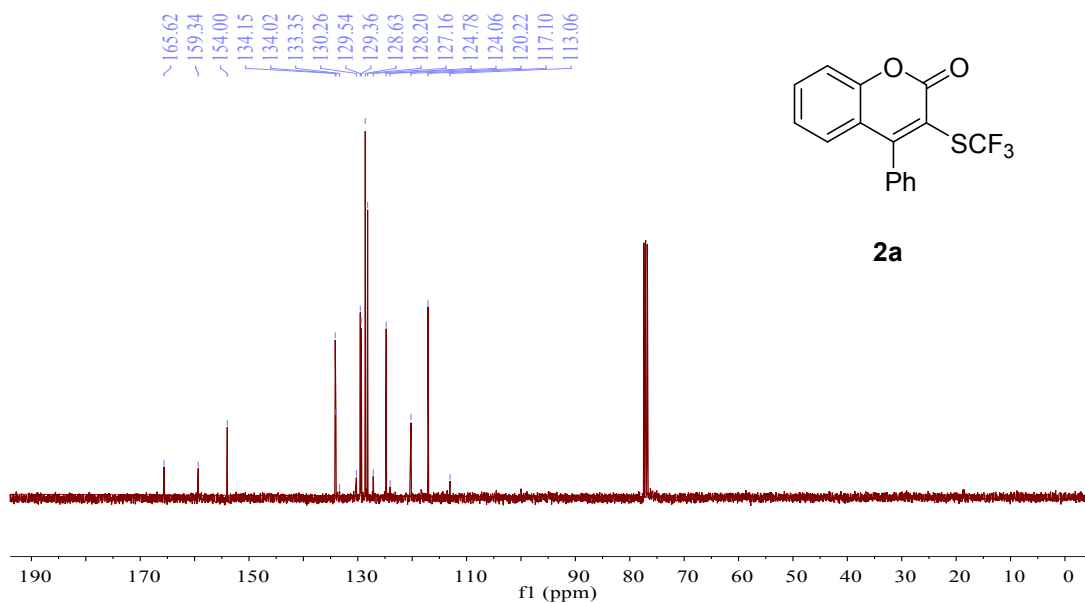

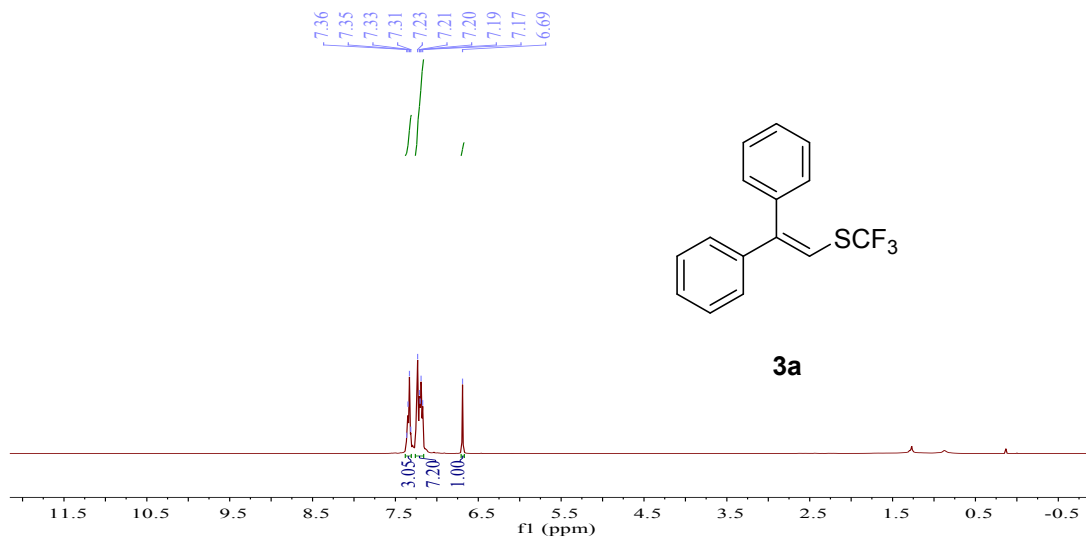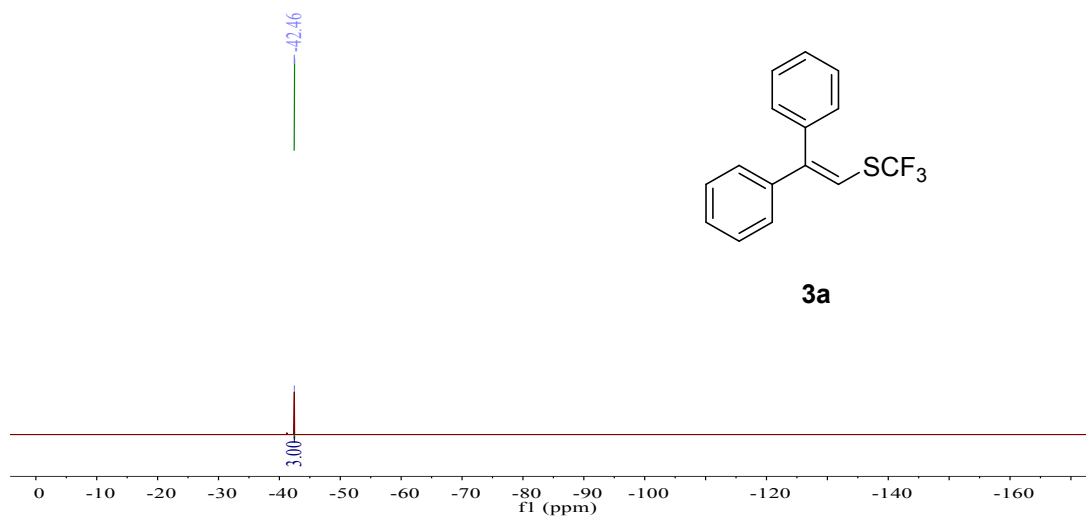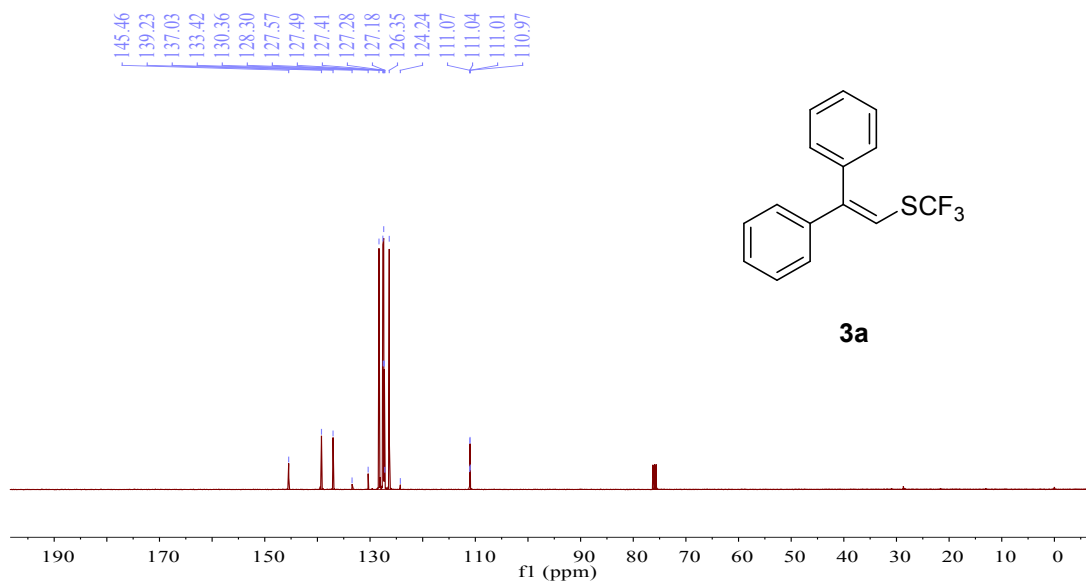

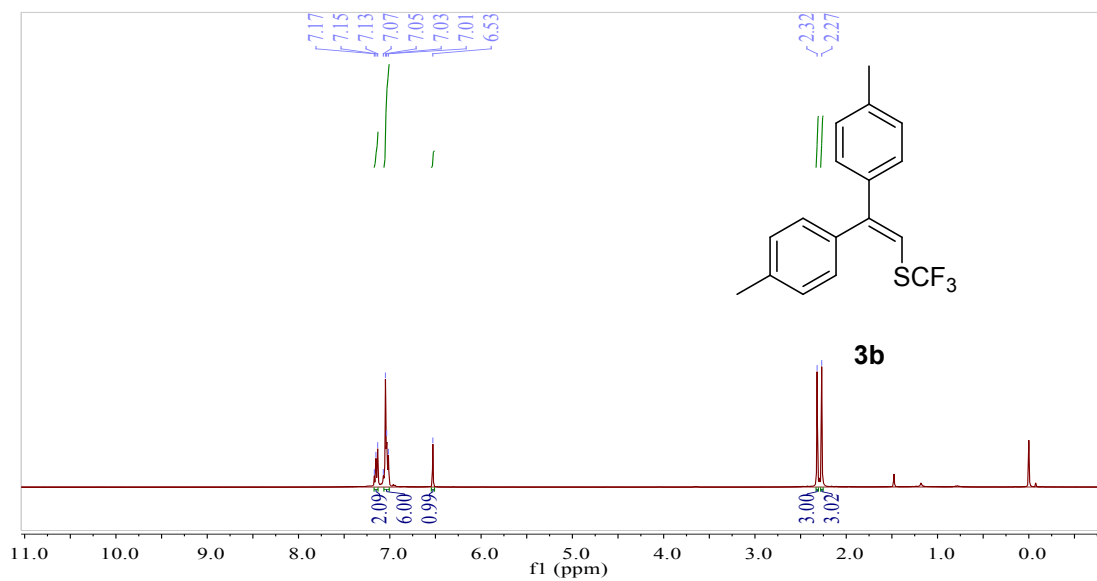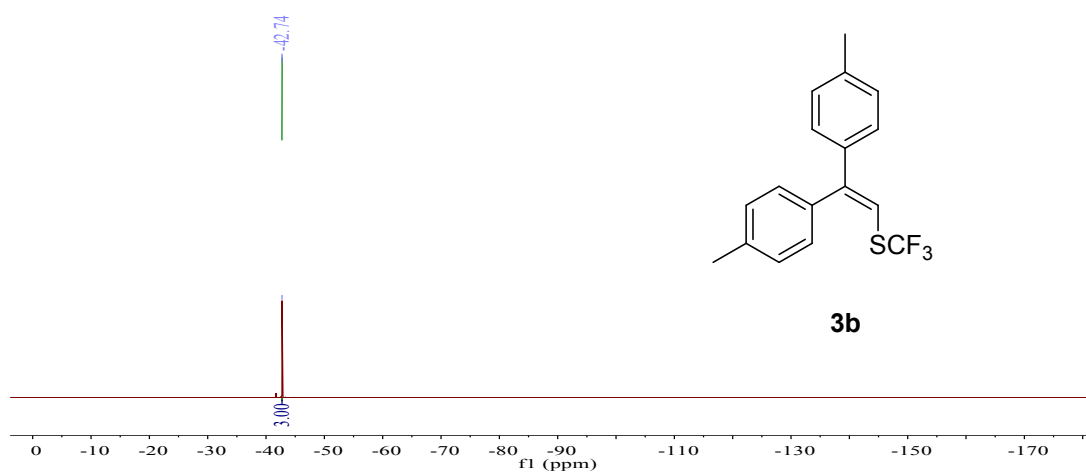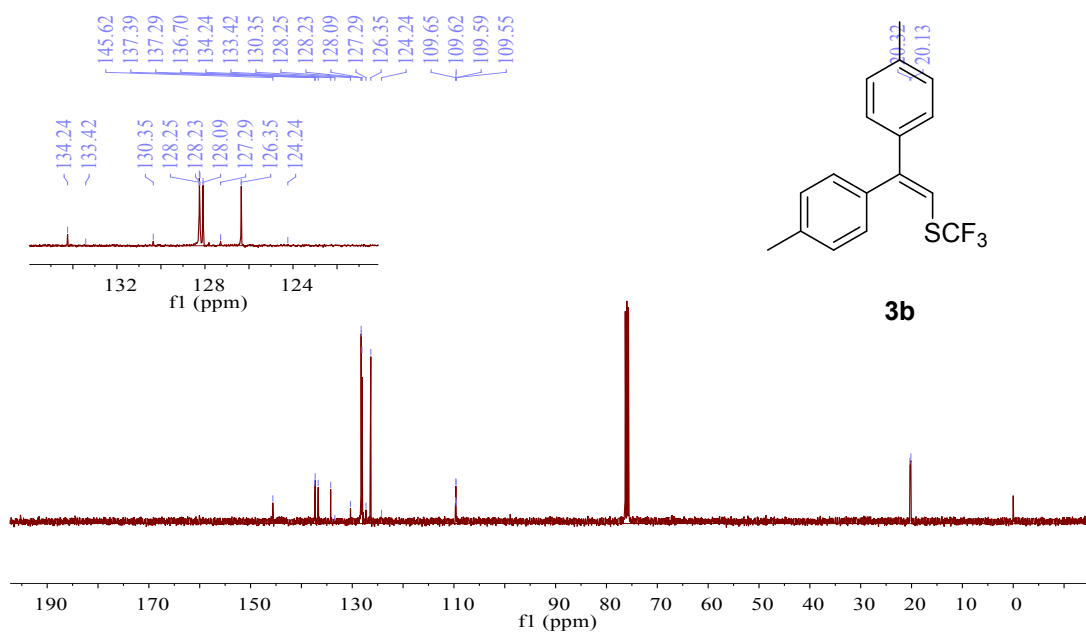

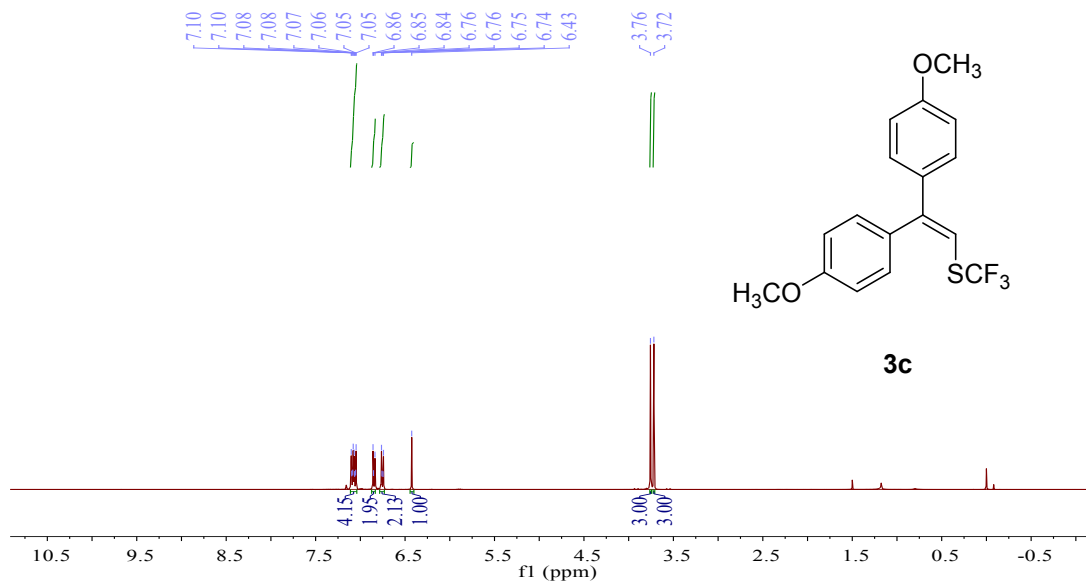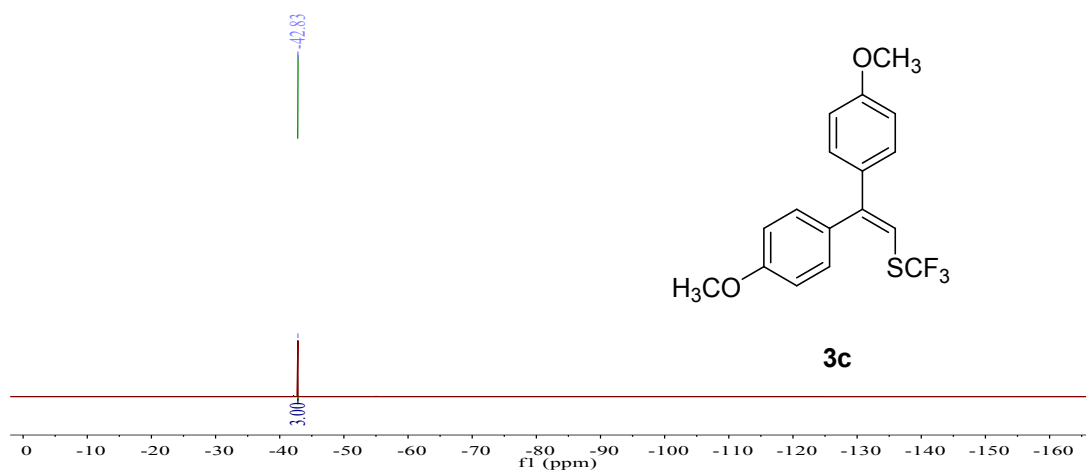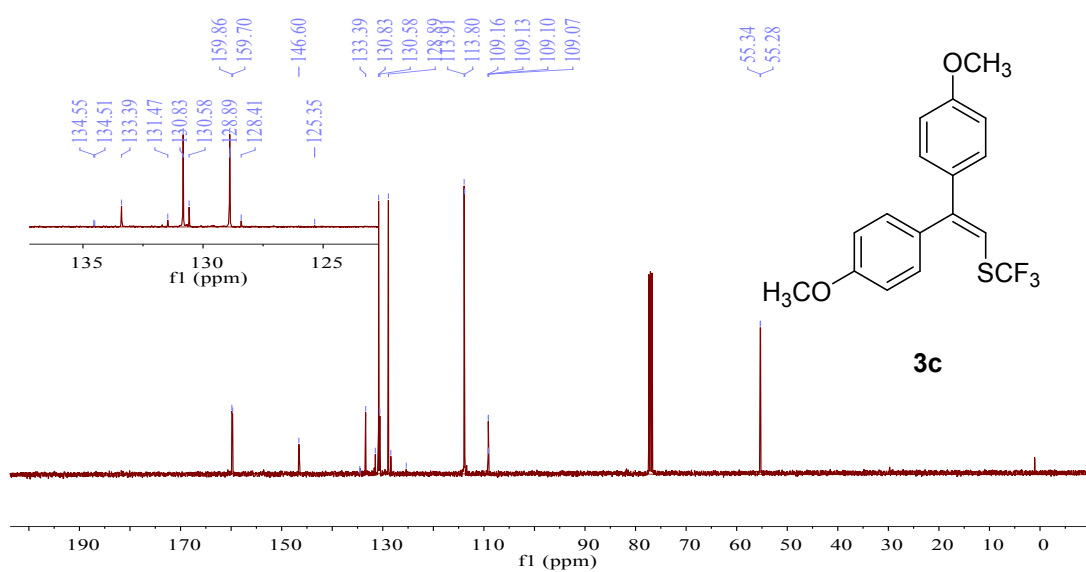

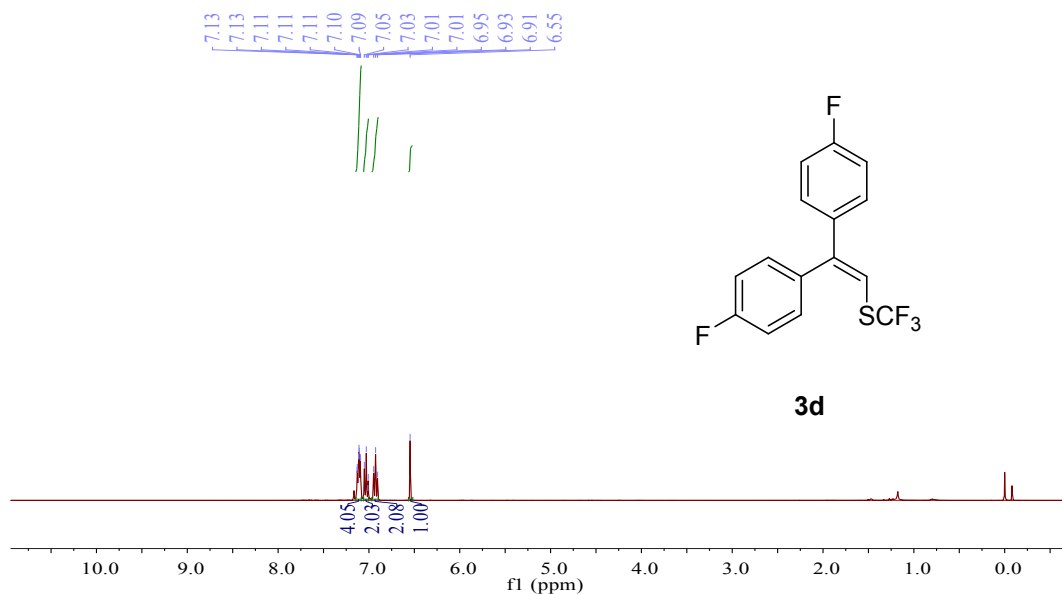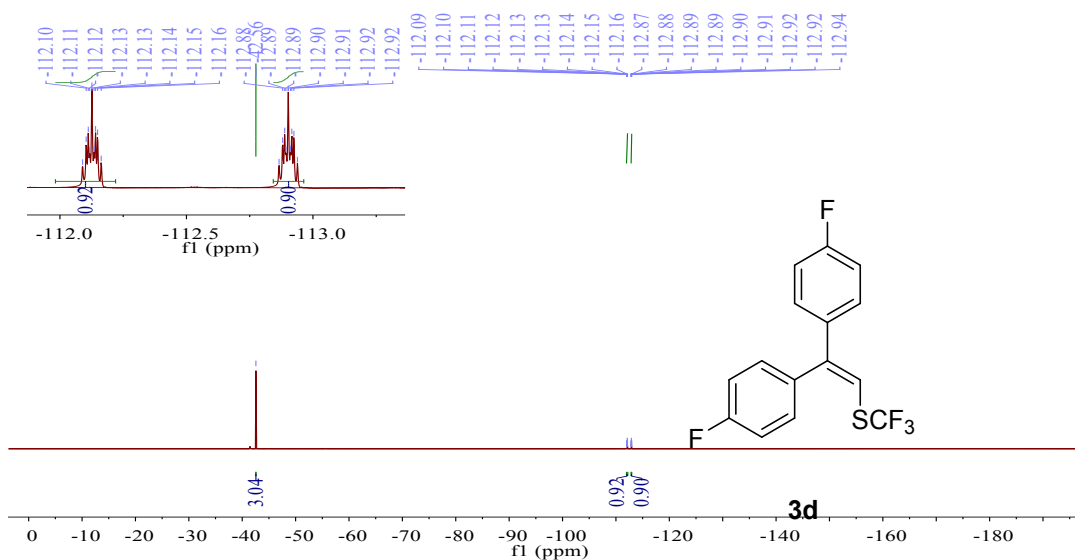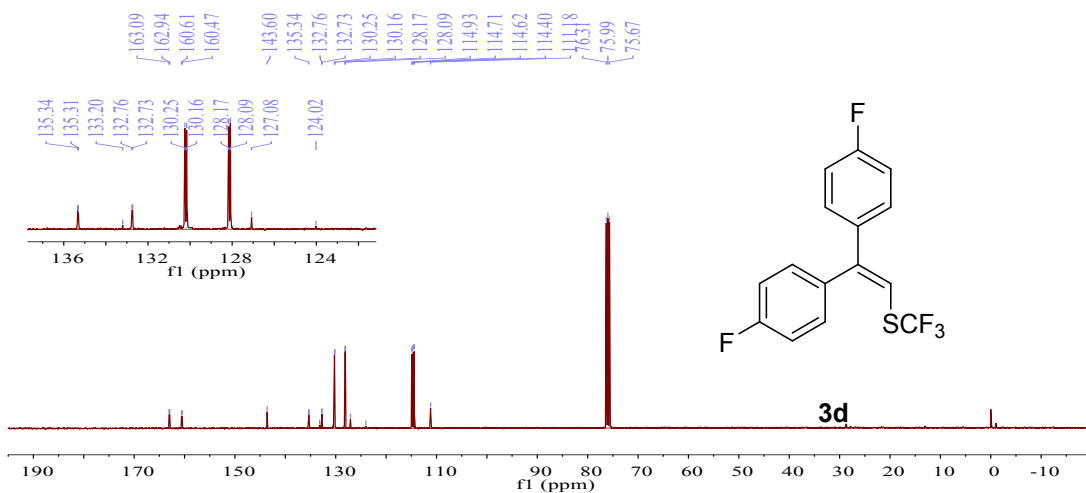

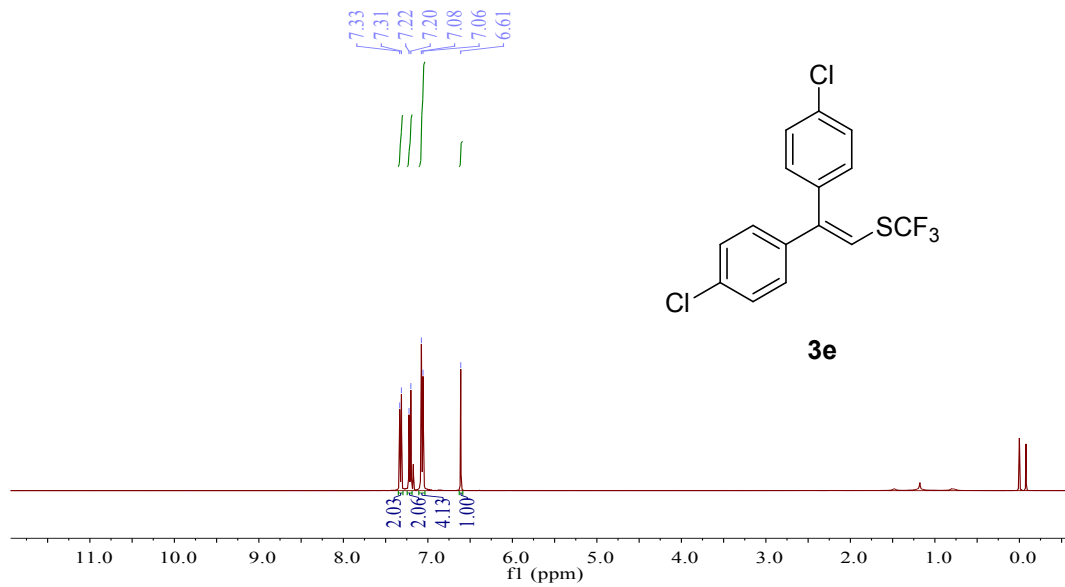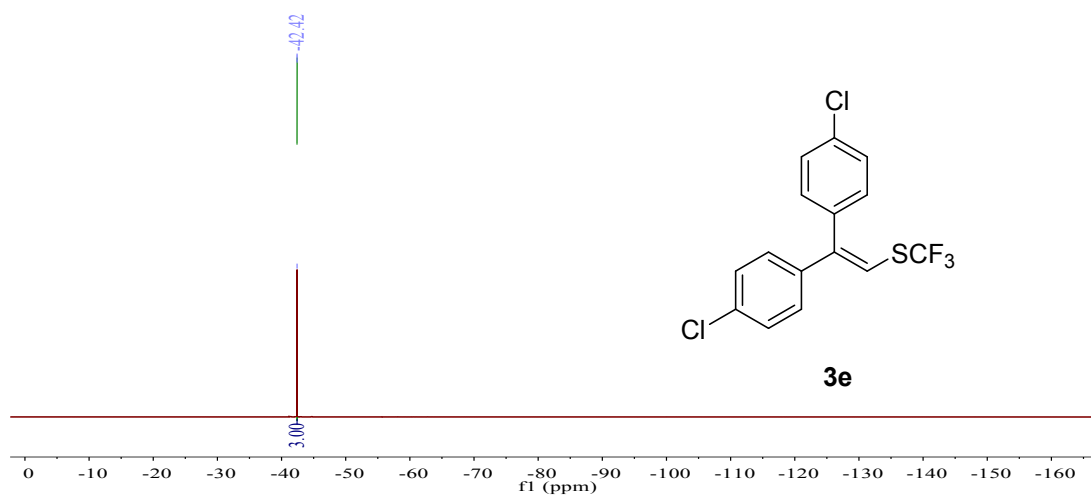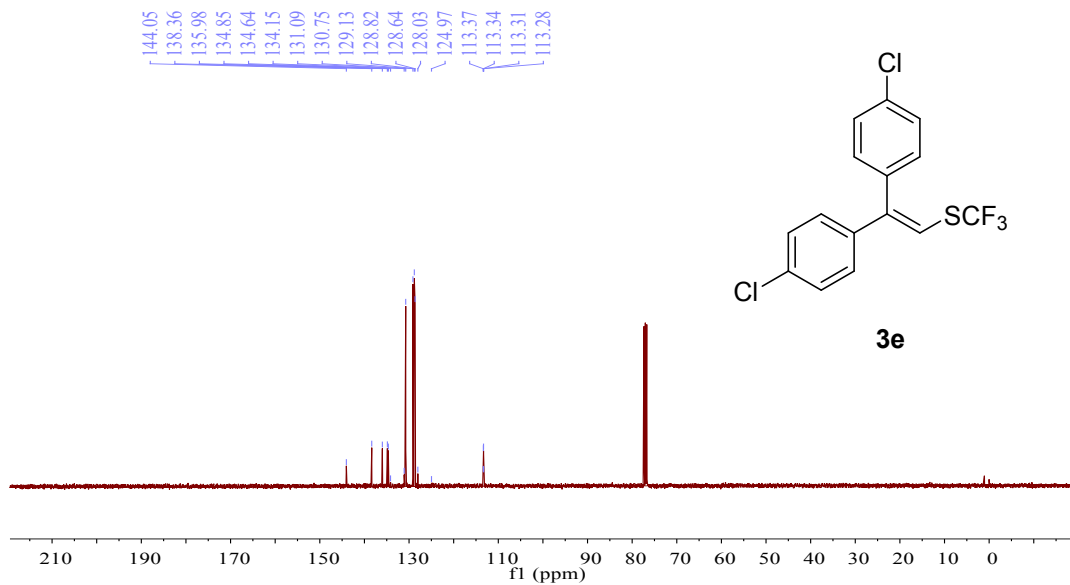

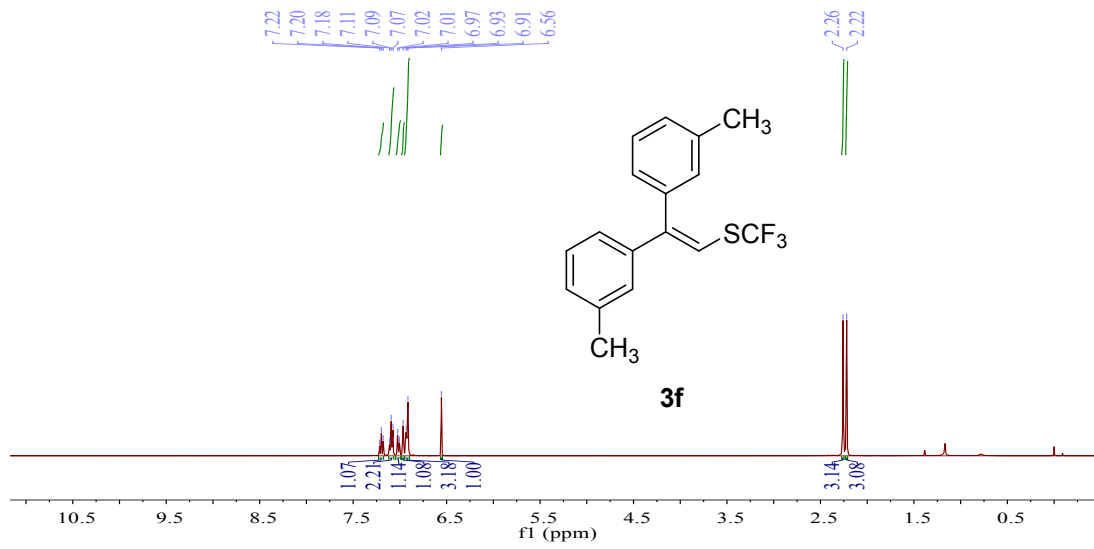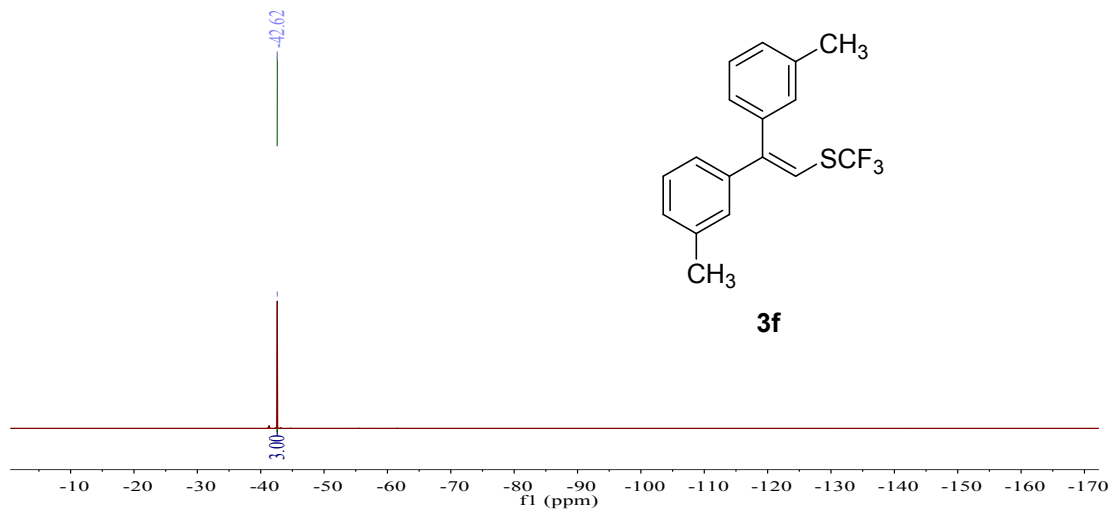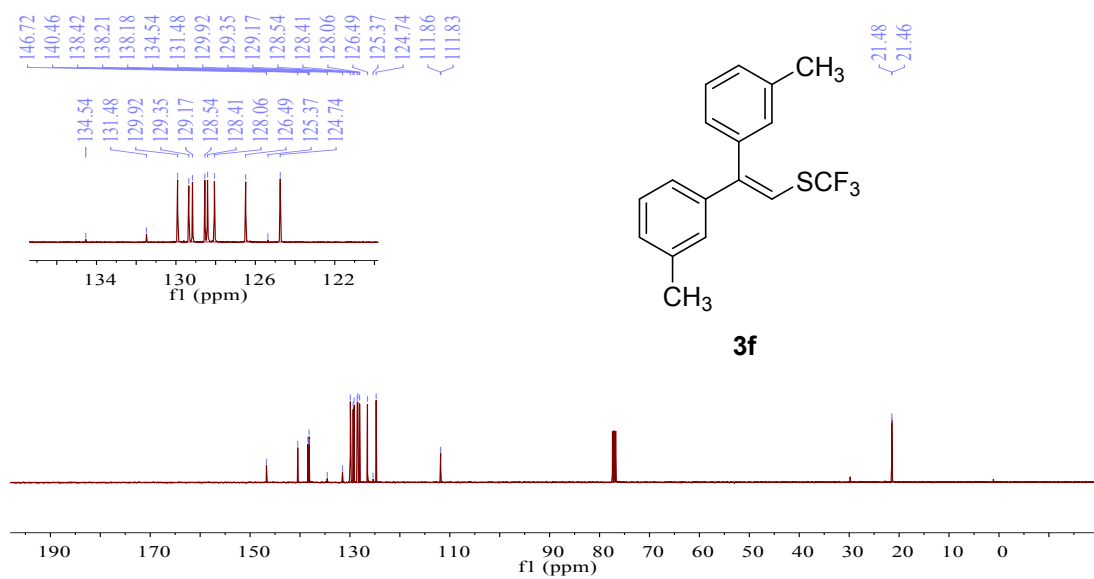

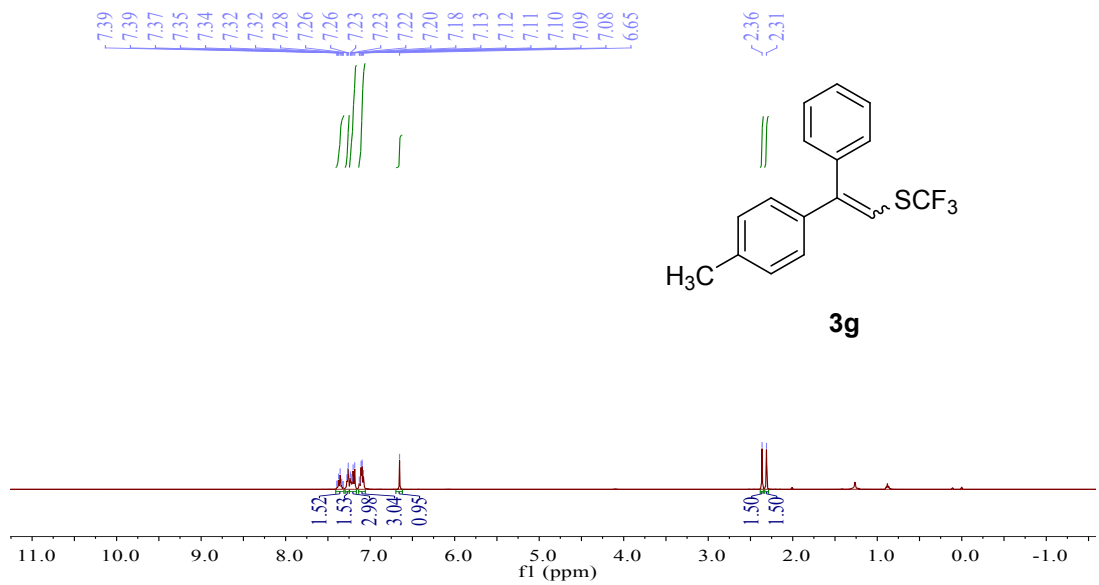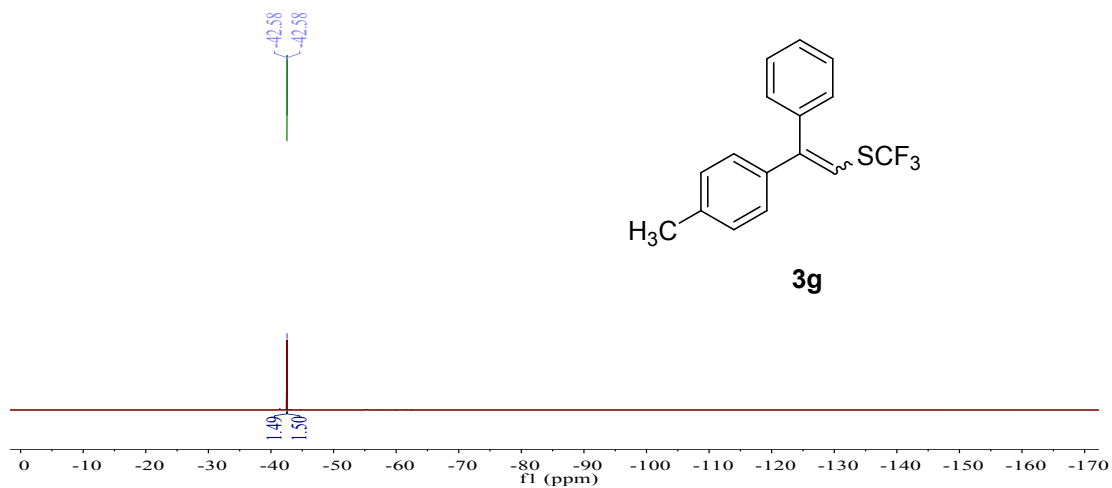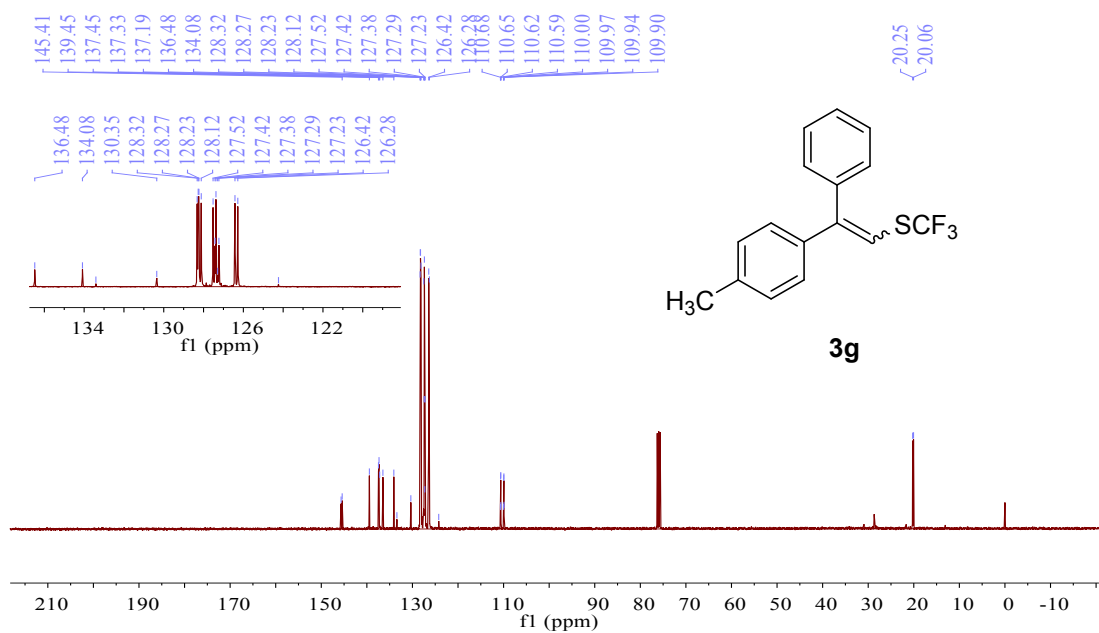



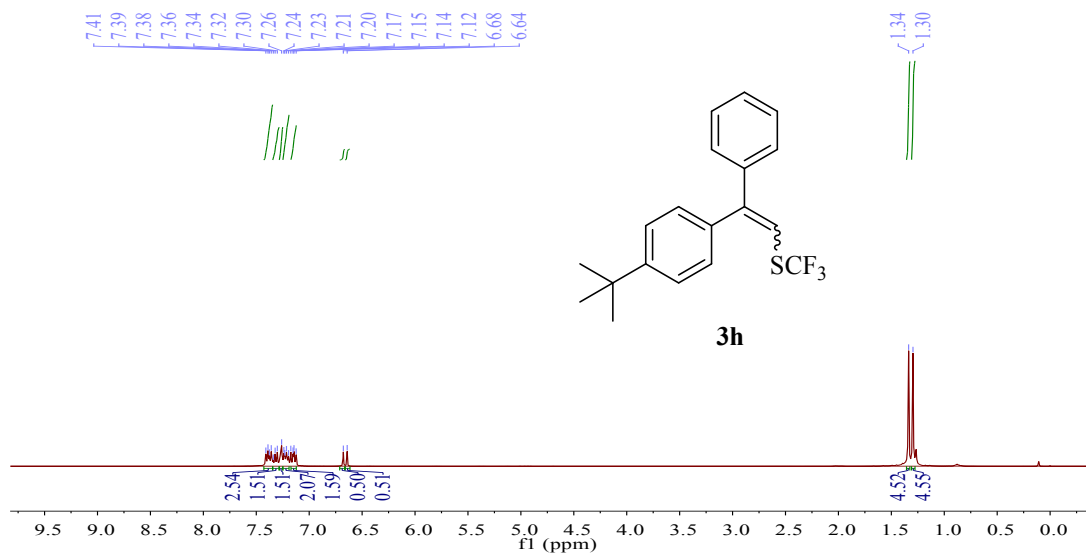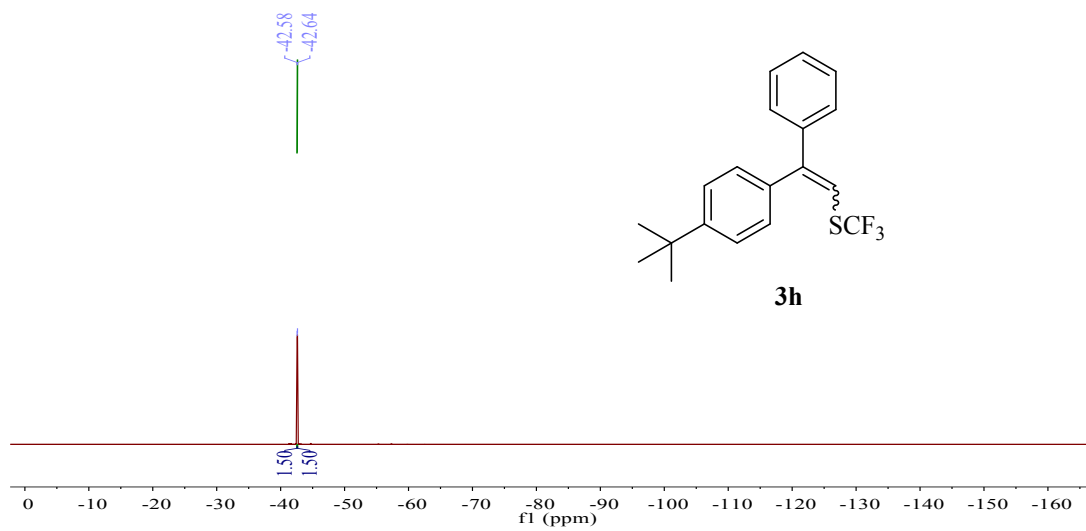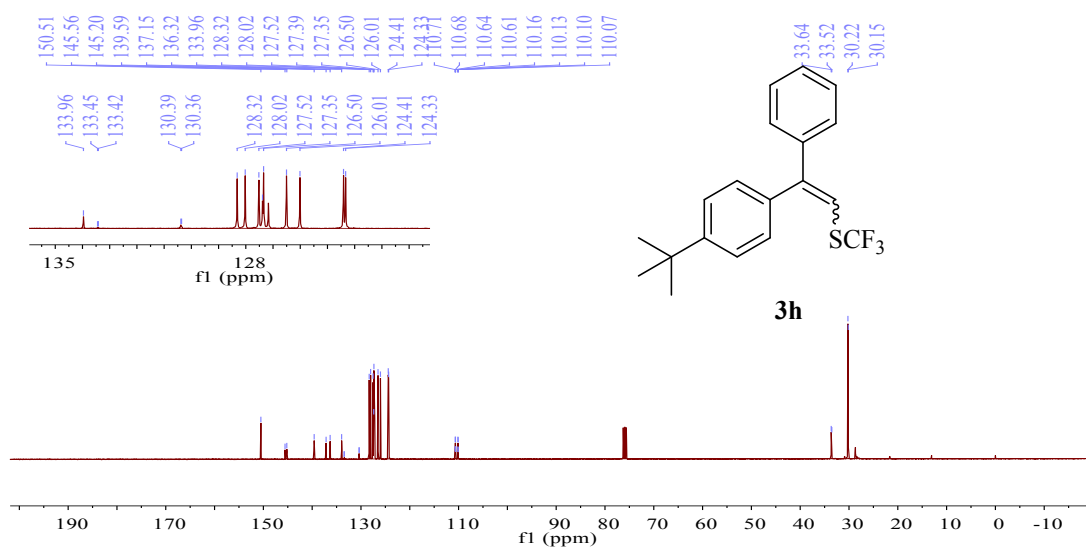

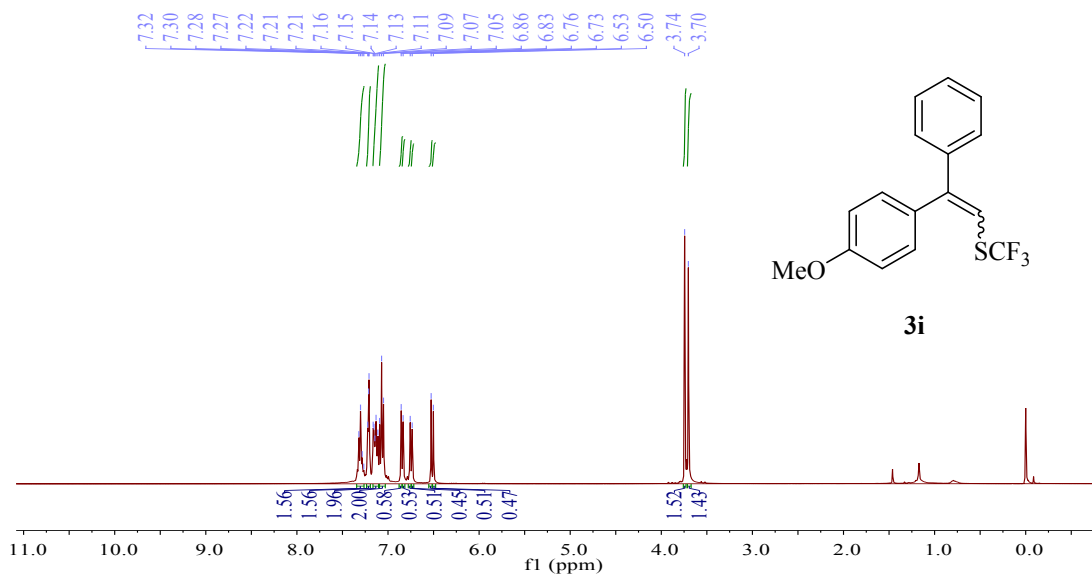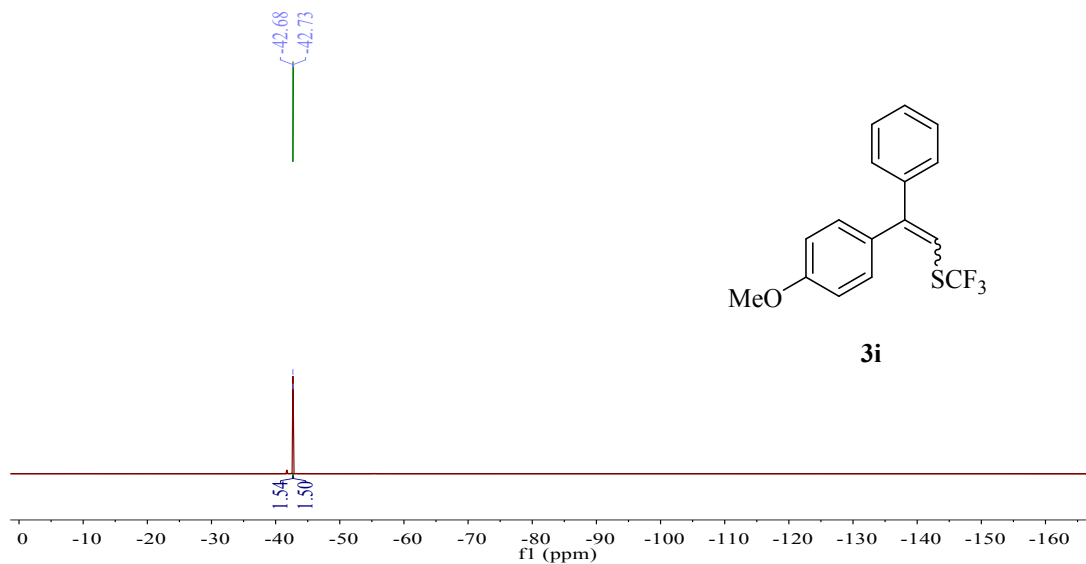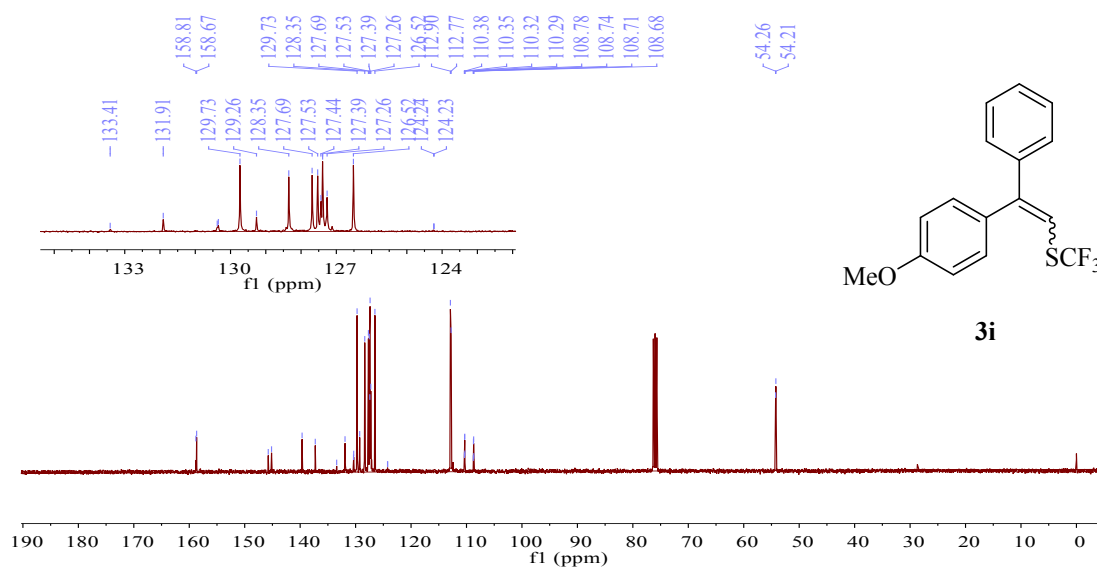

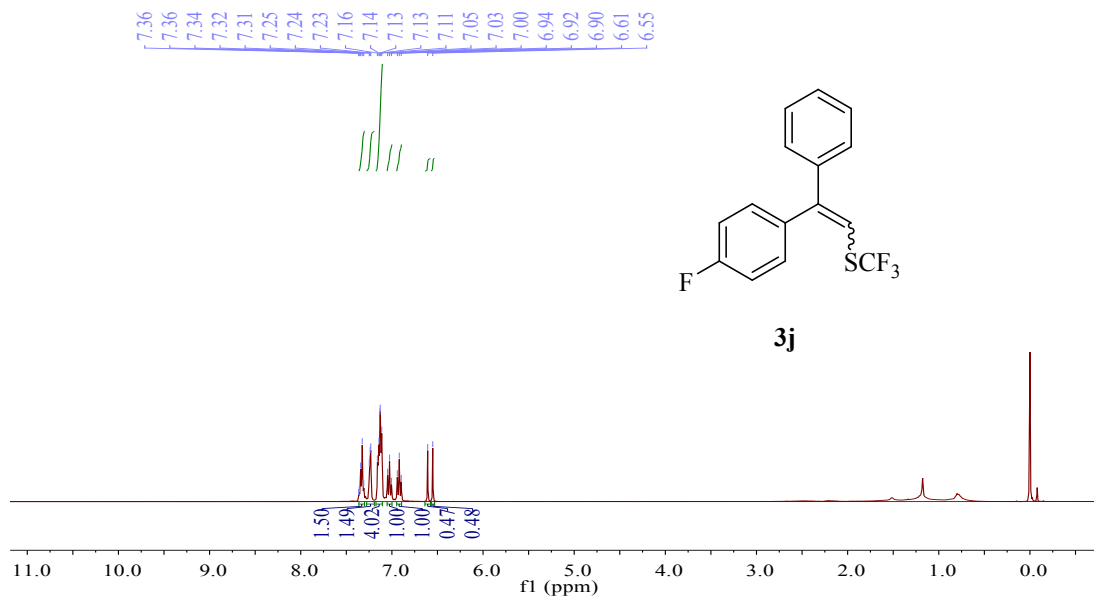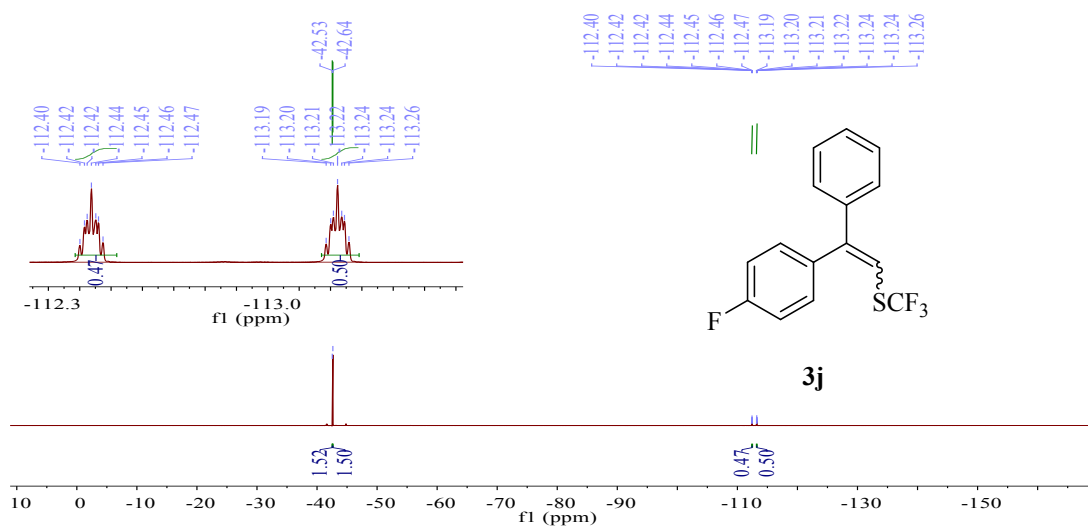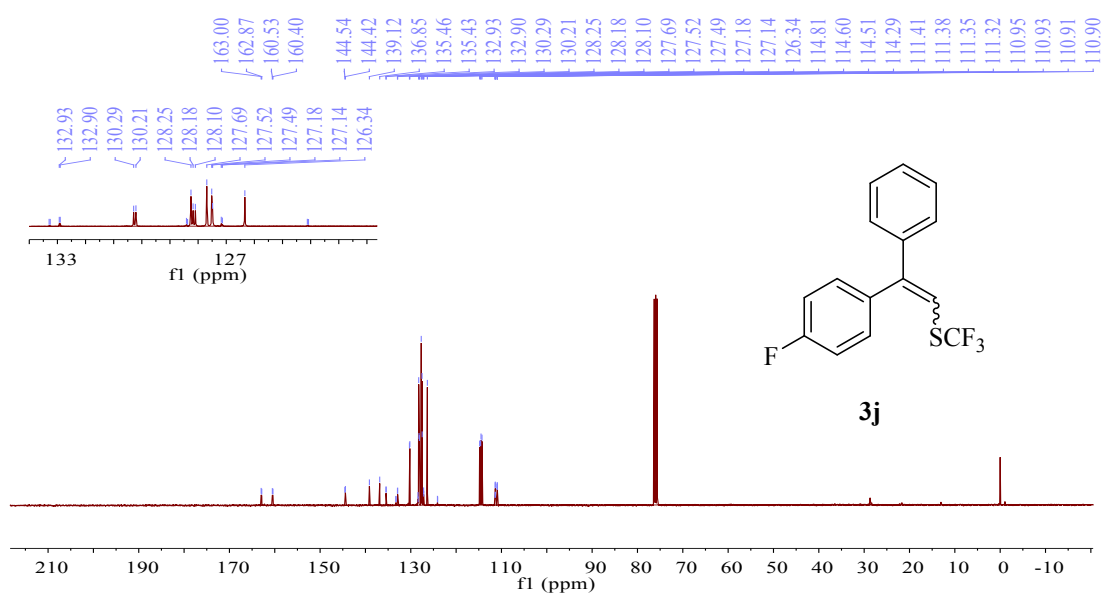

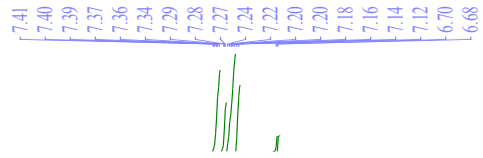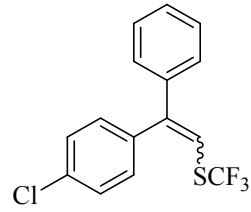

**3k**

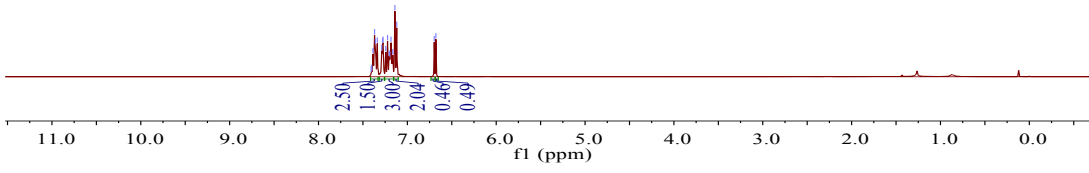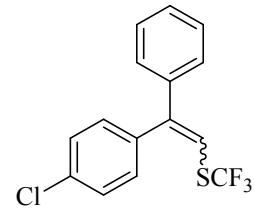

**3k**

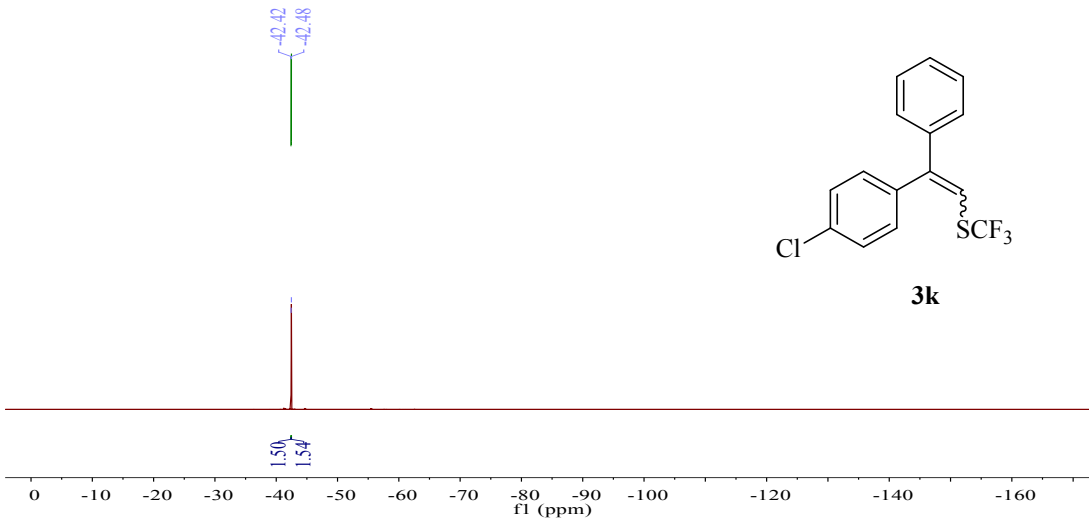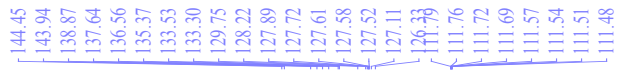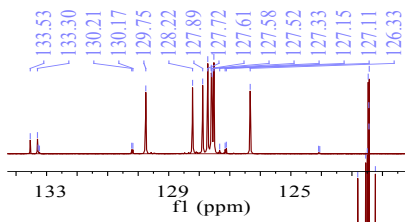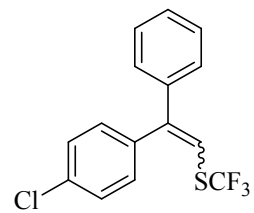

**3k**

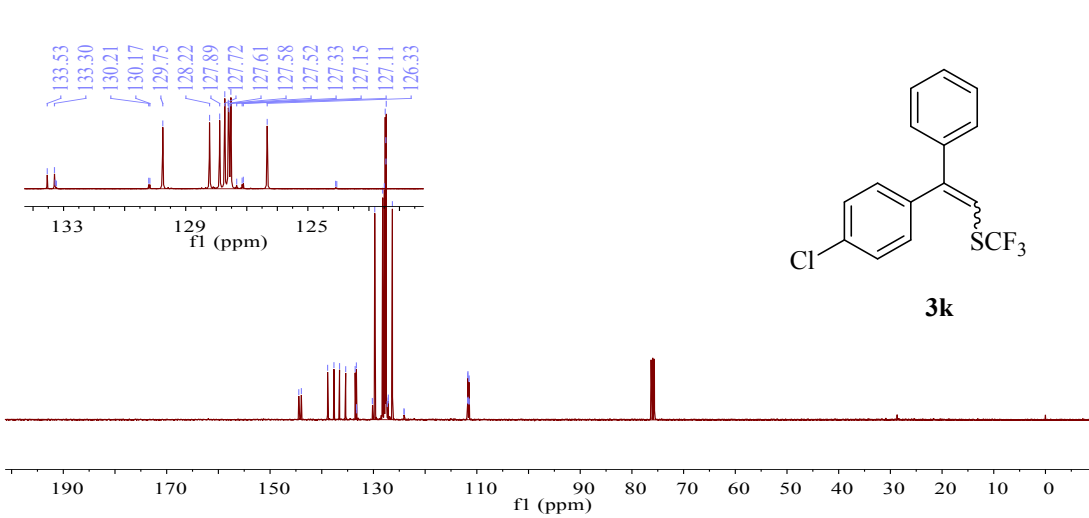

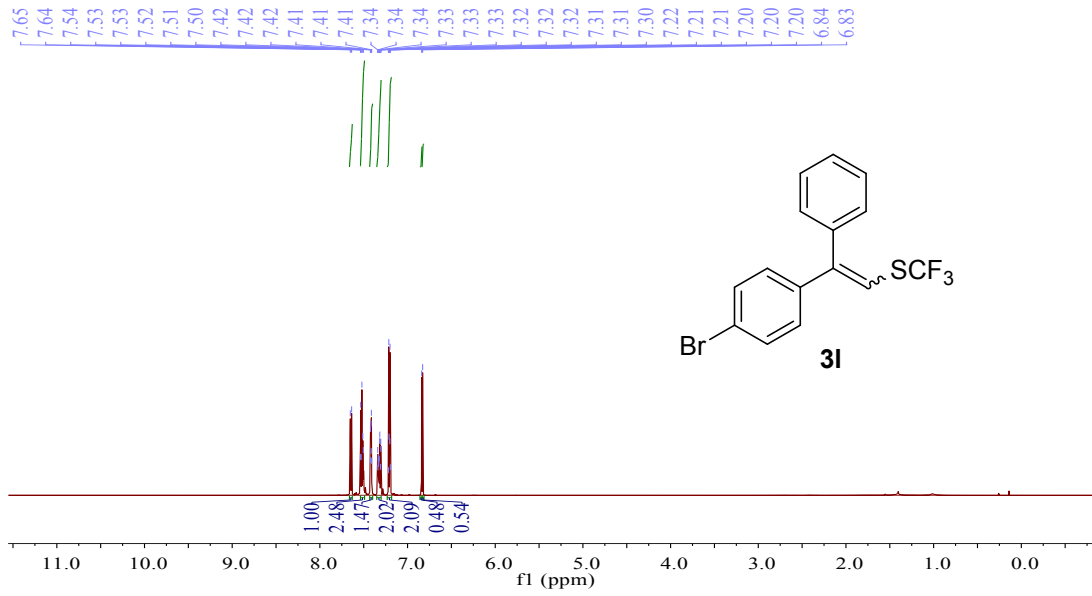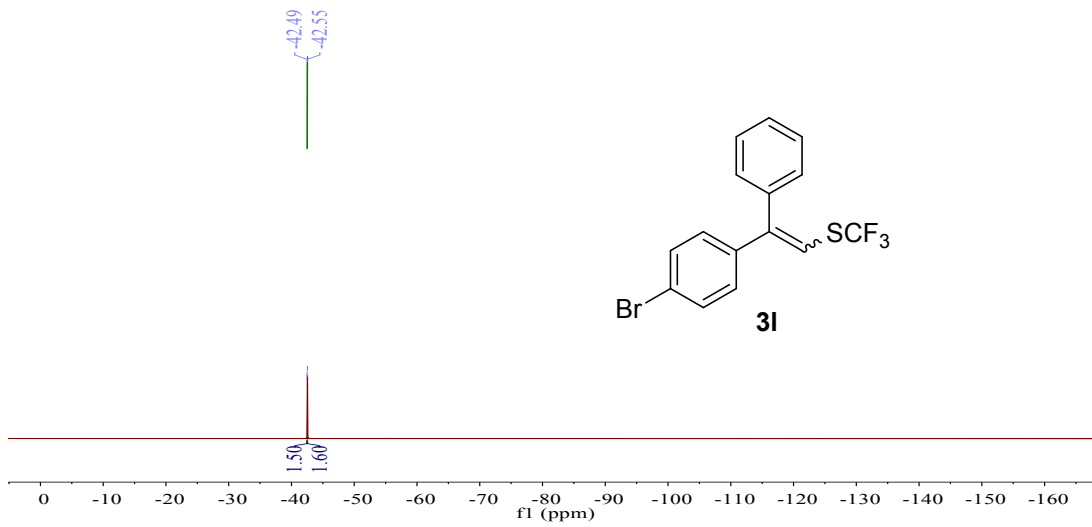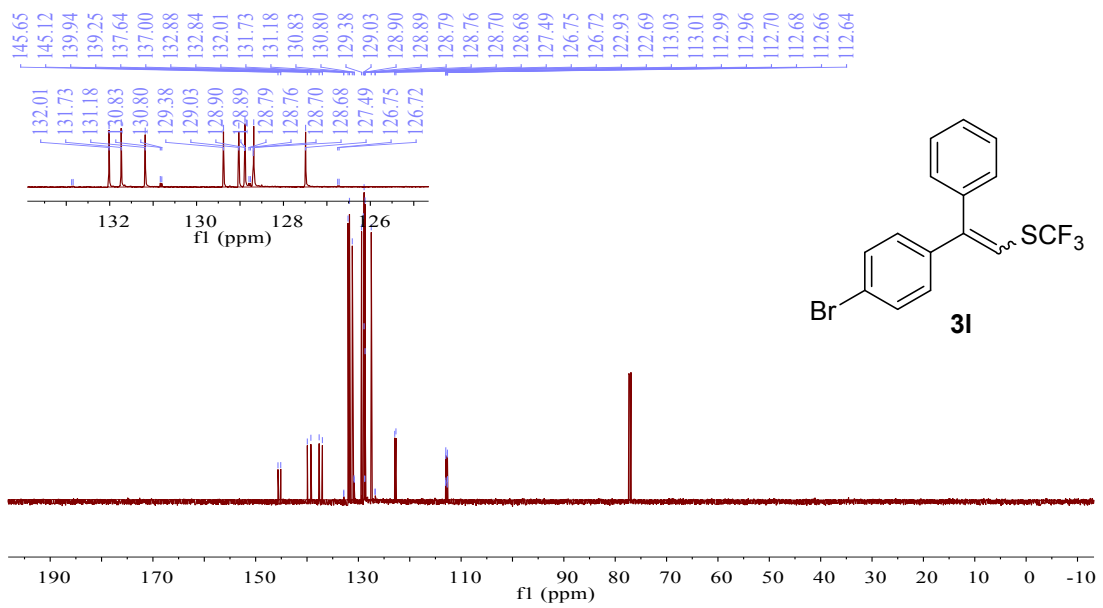

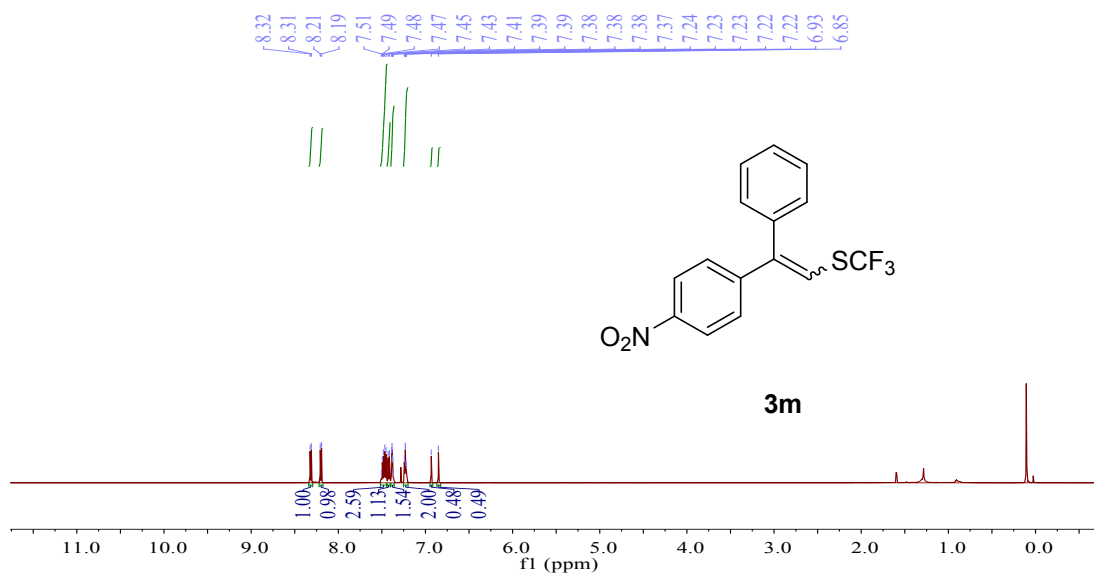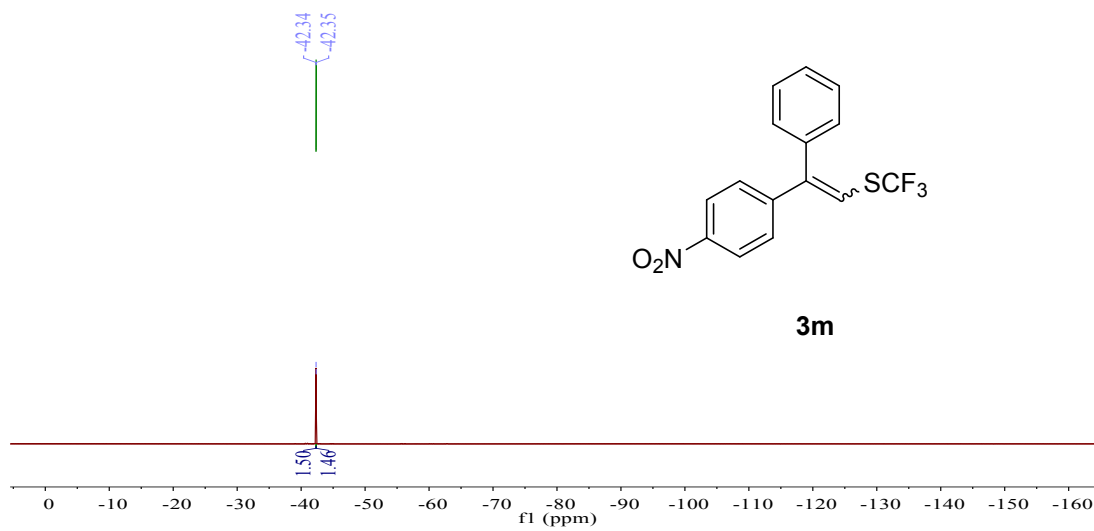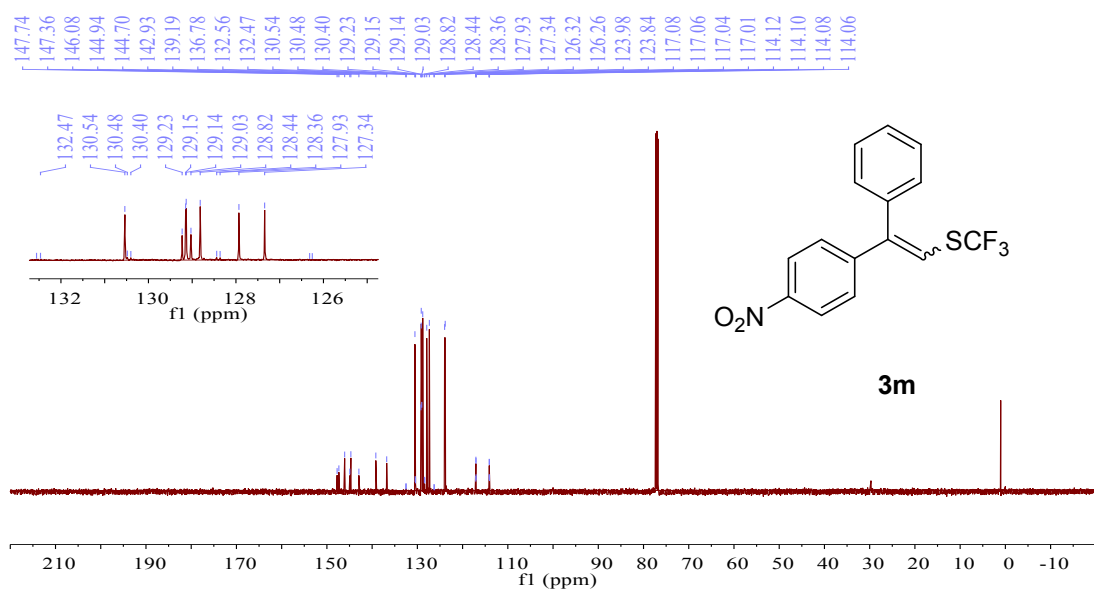

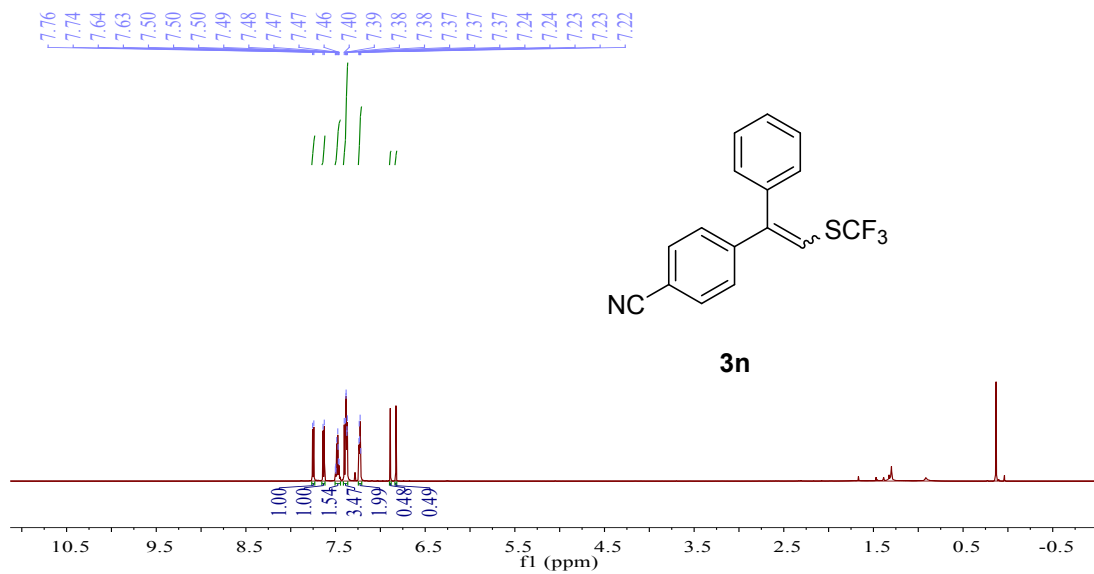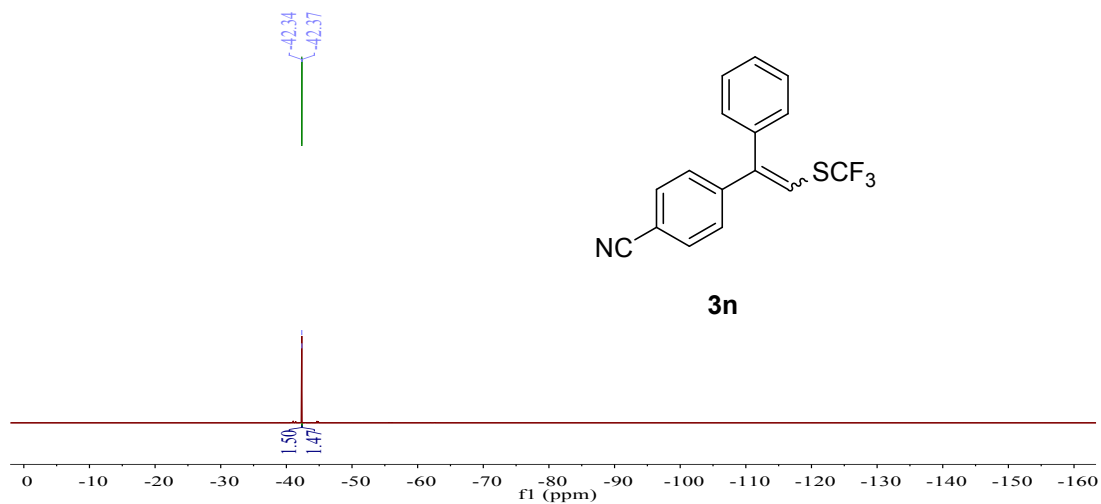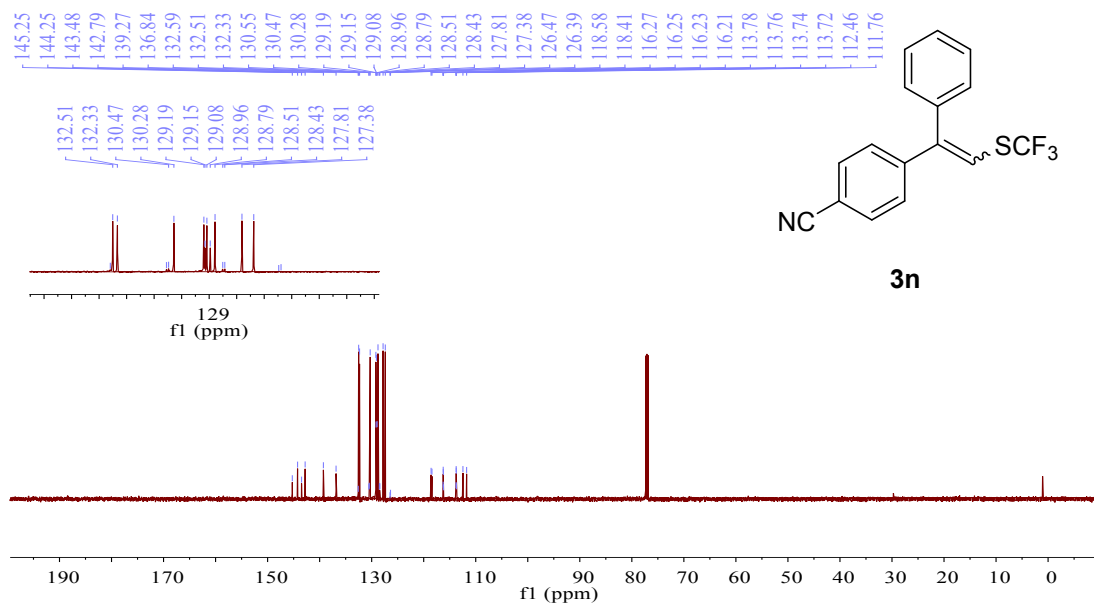

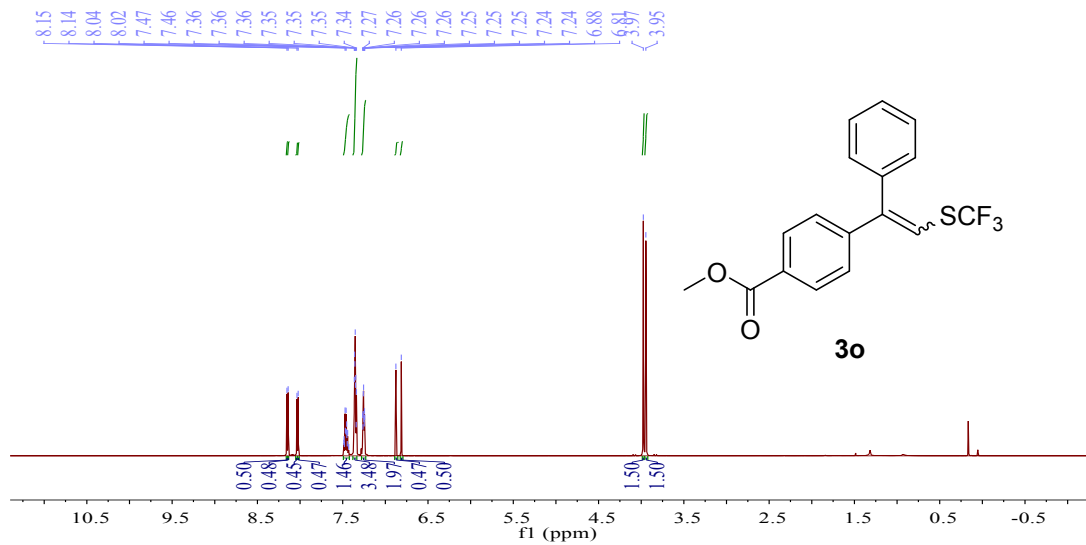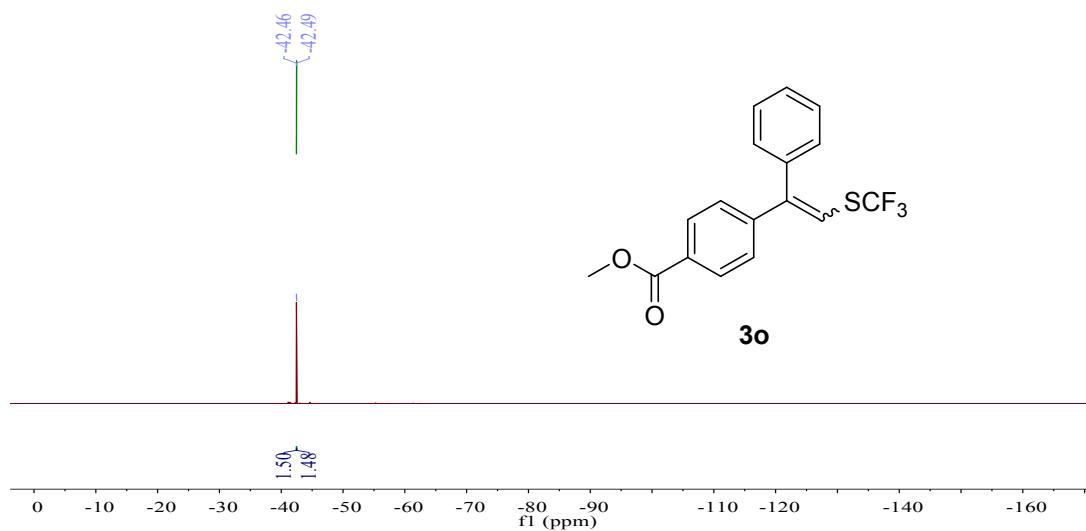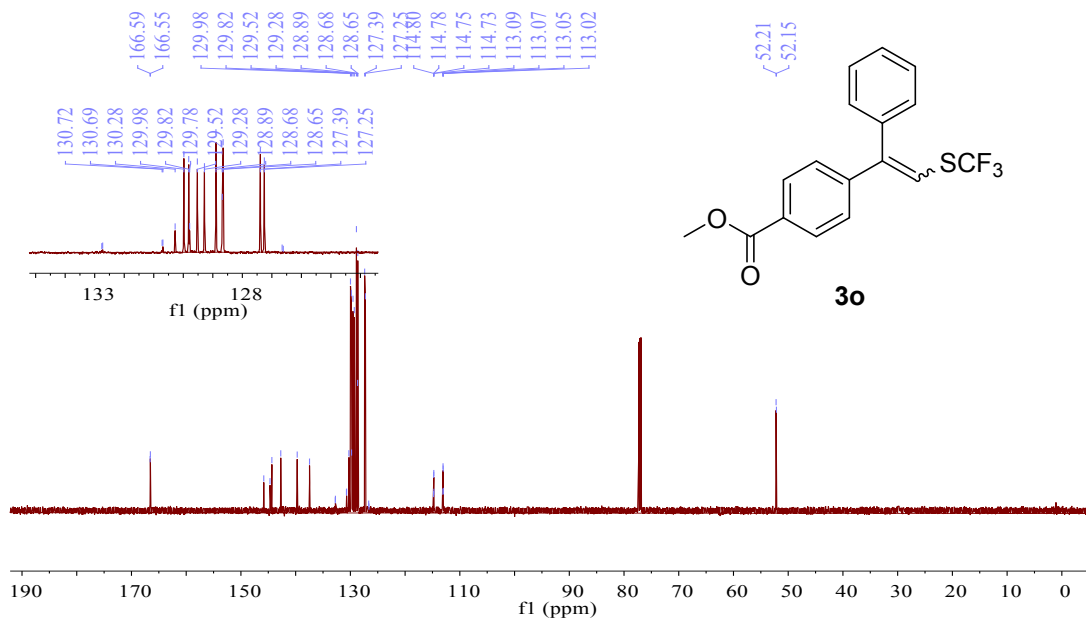



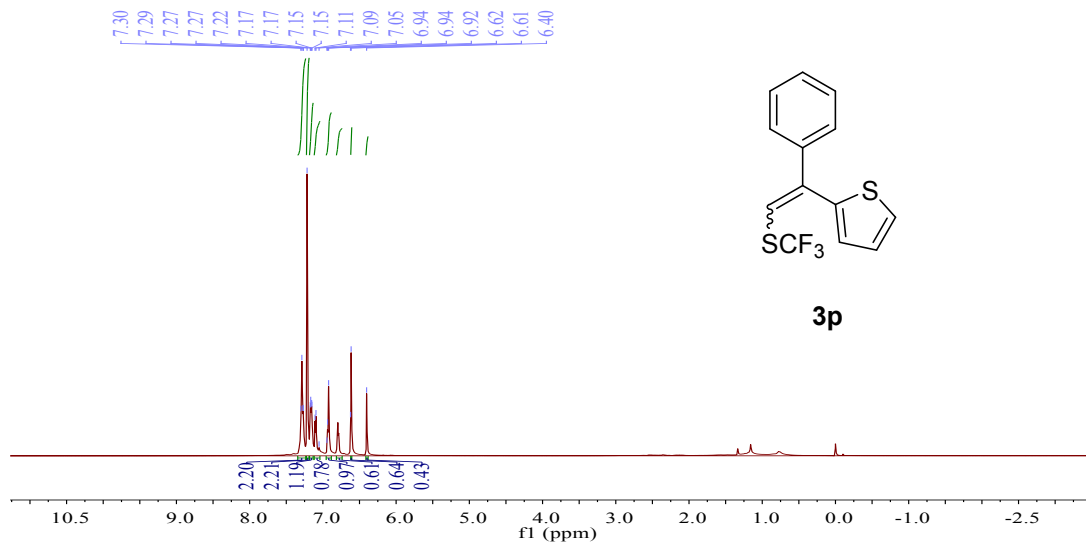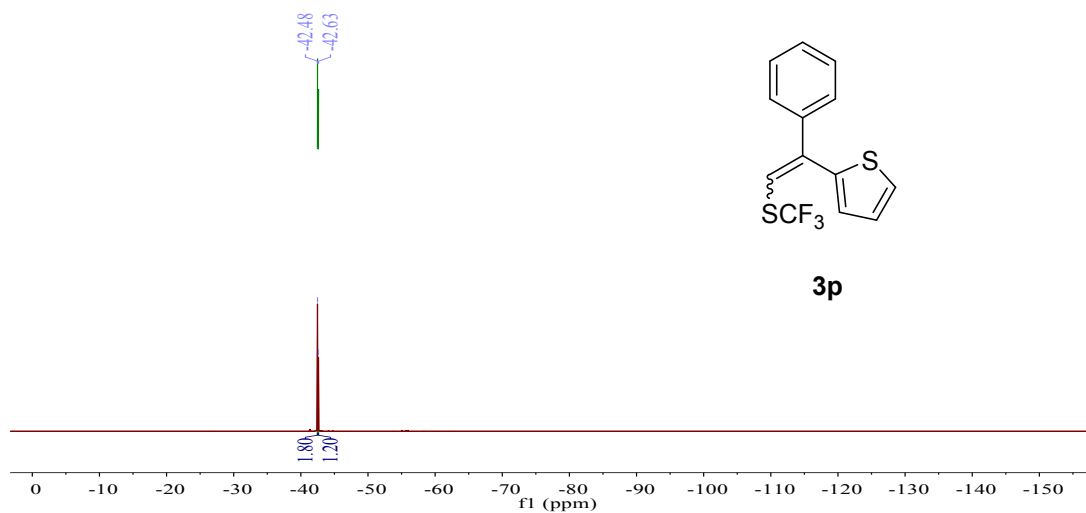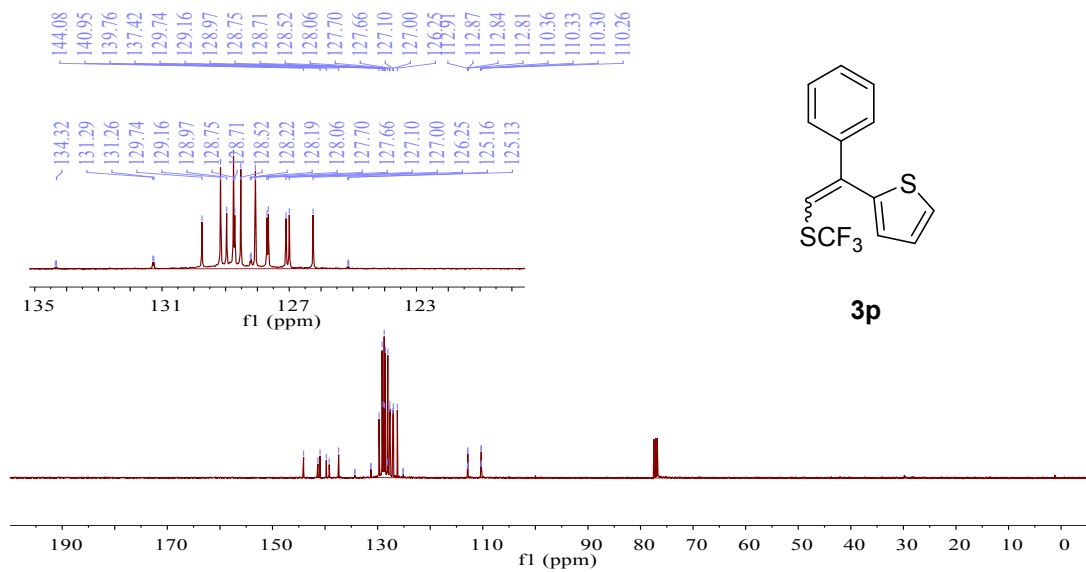

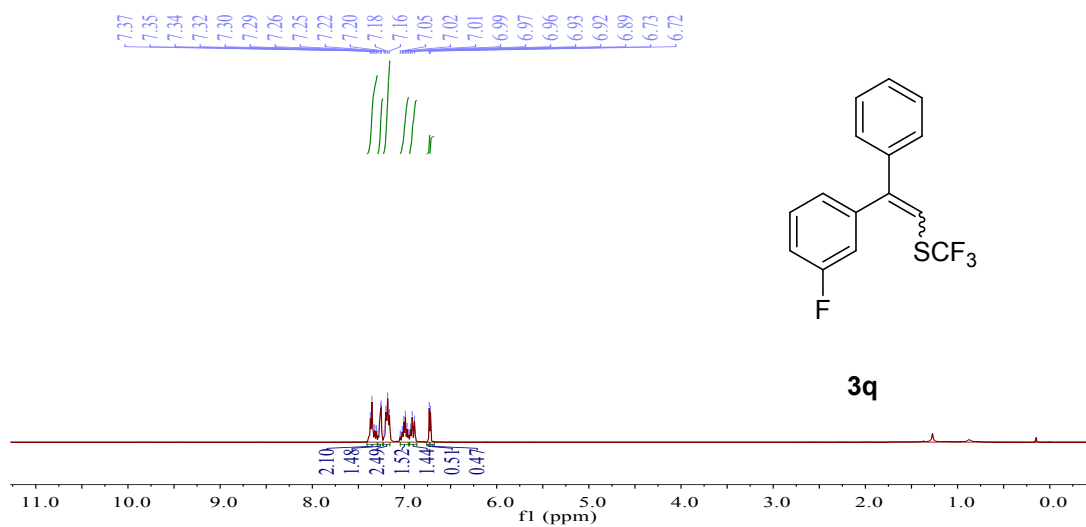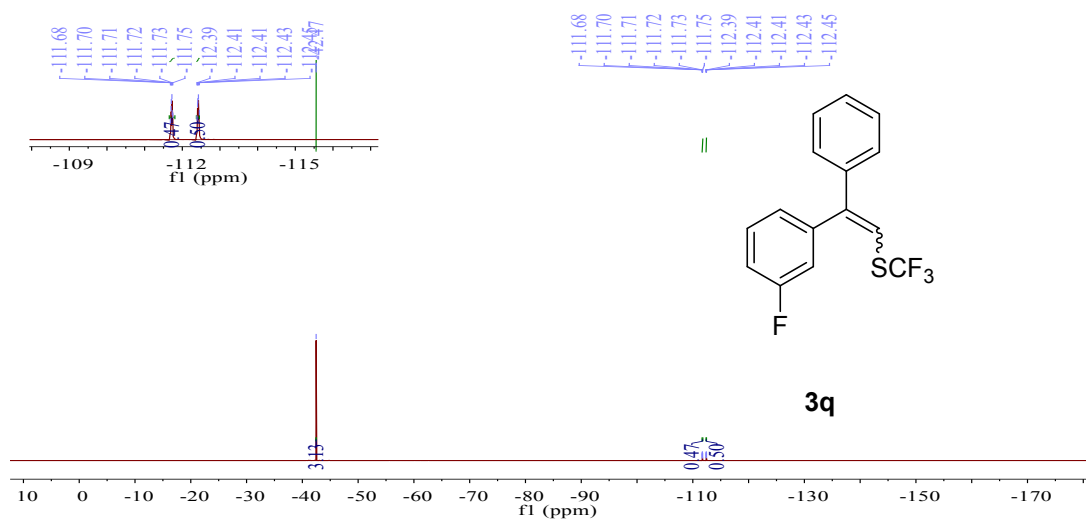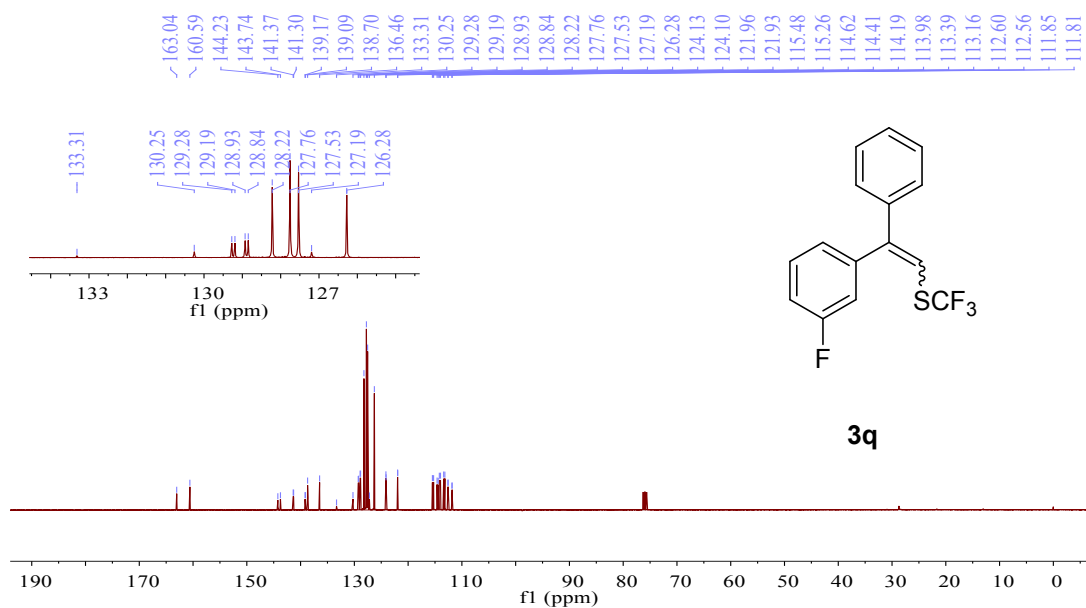

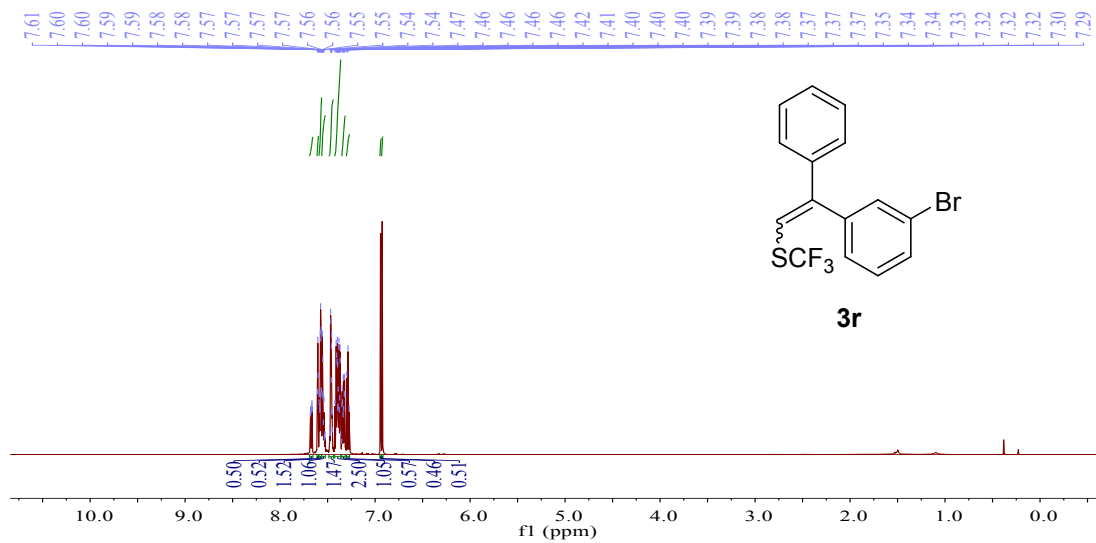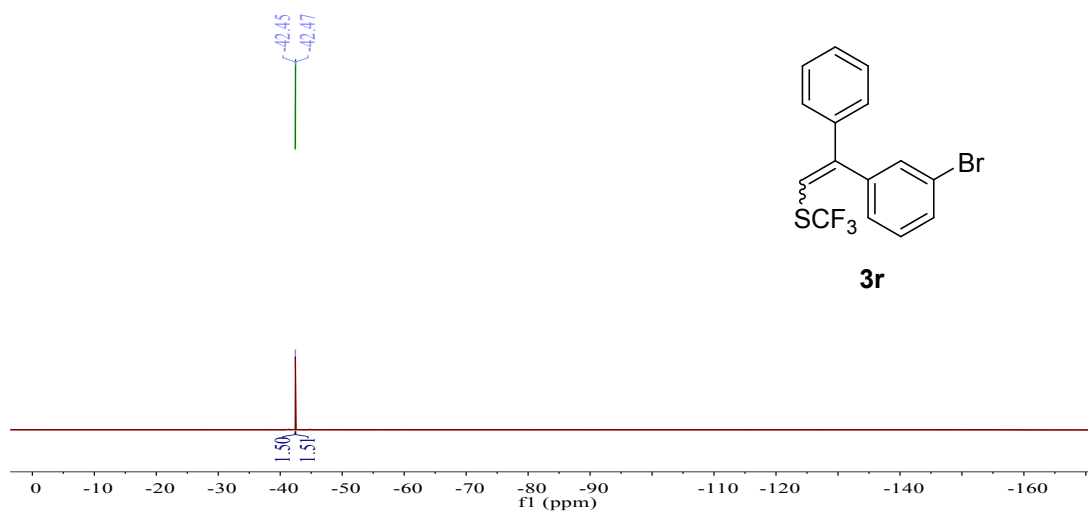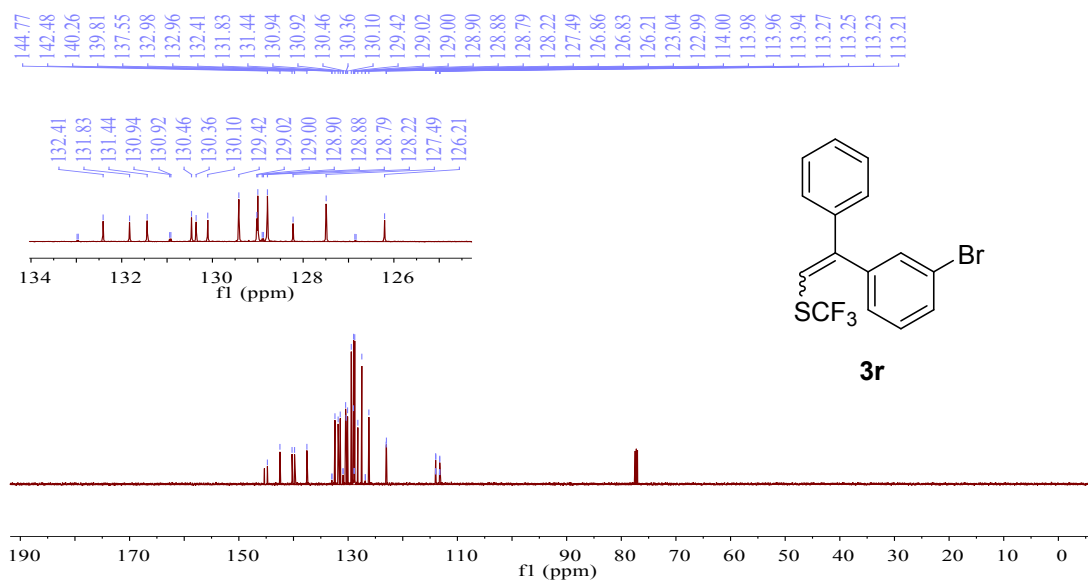

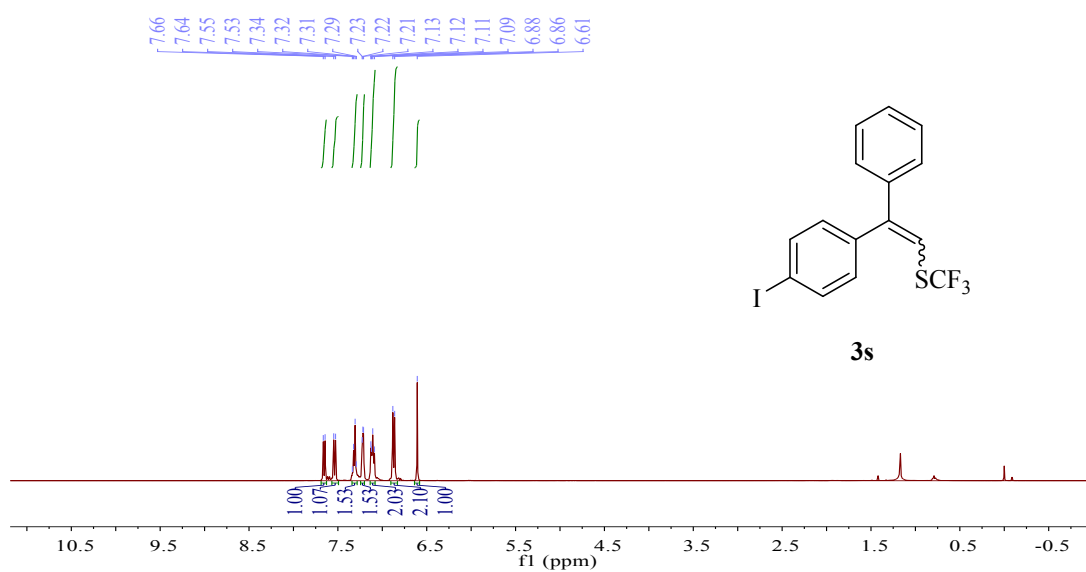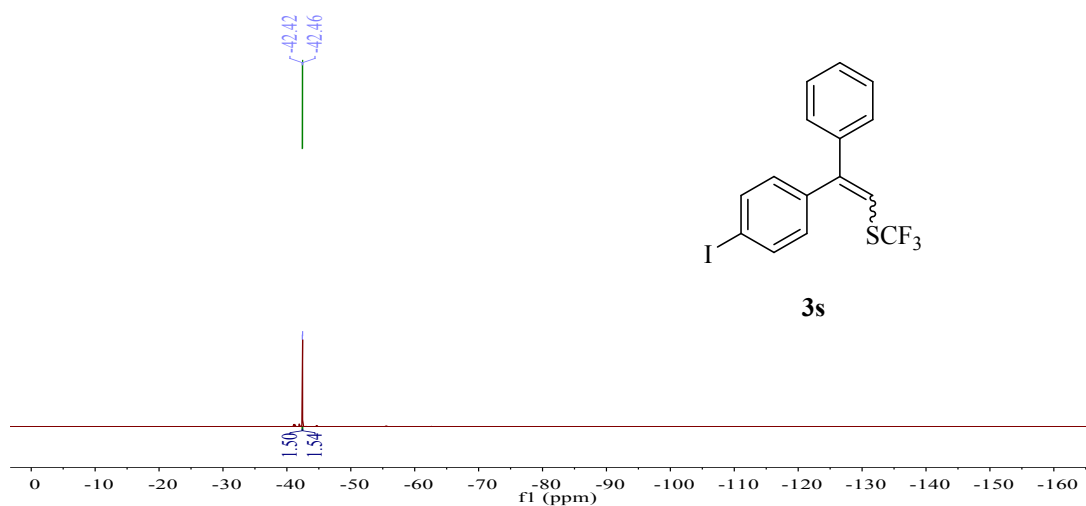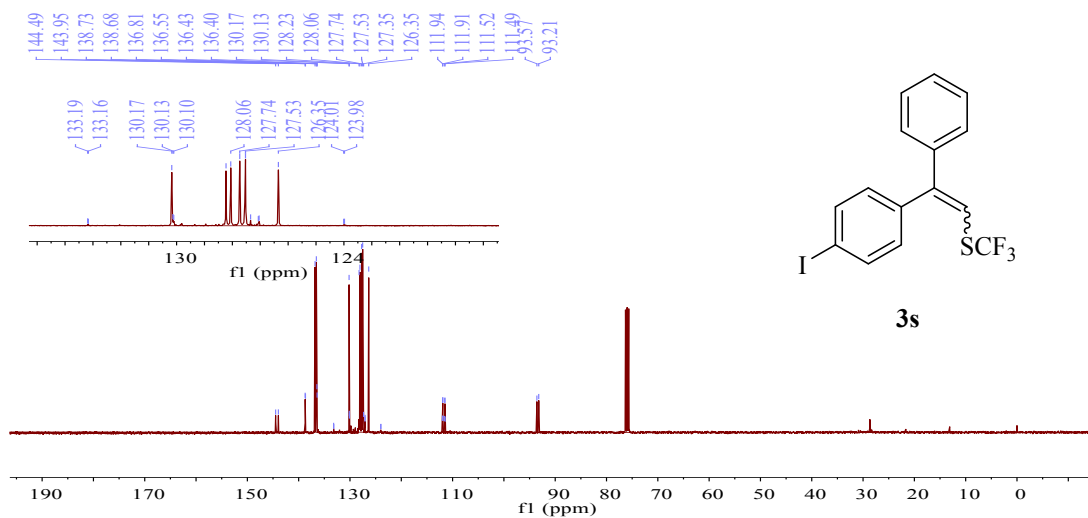

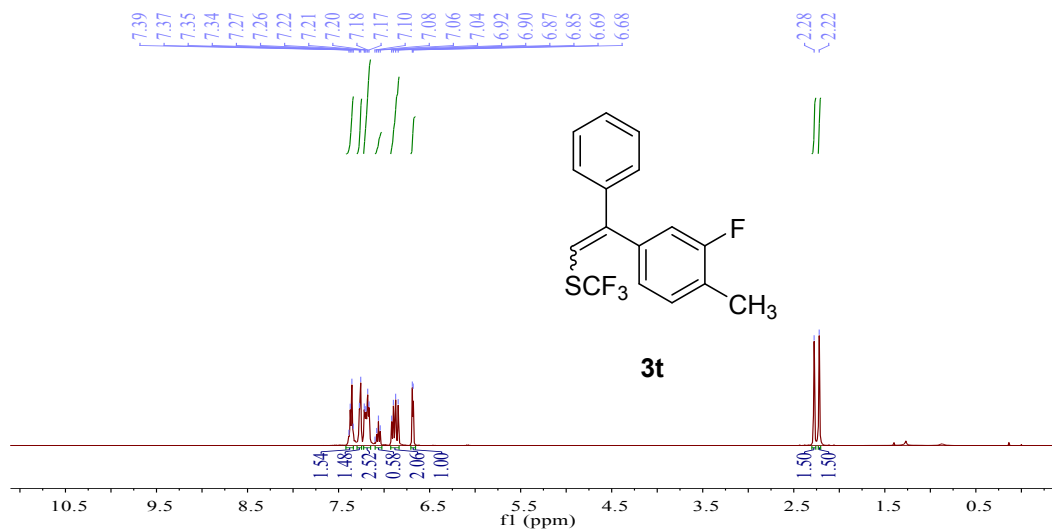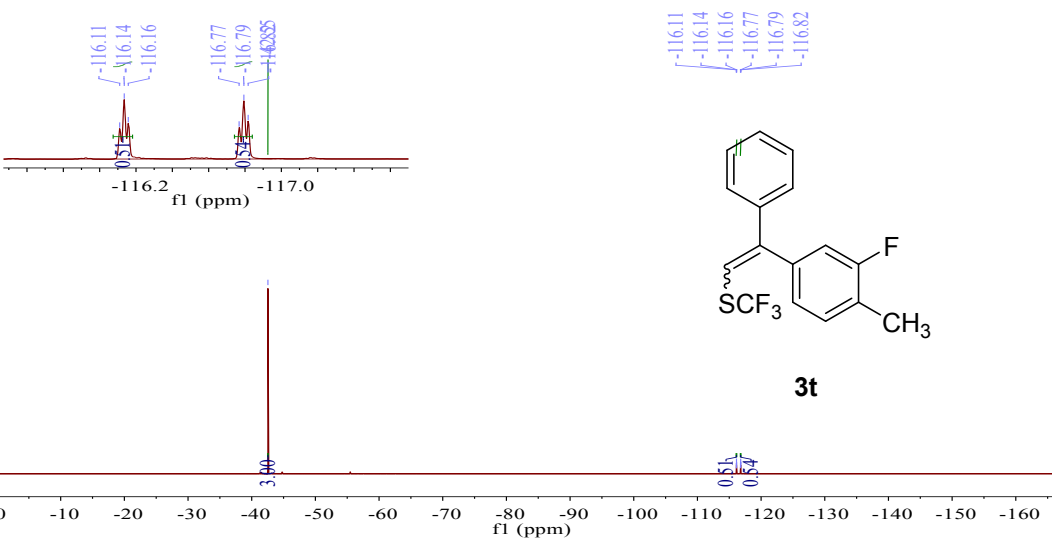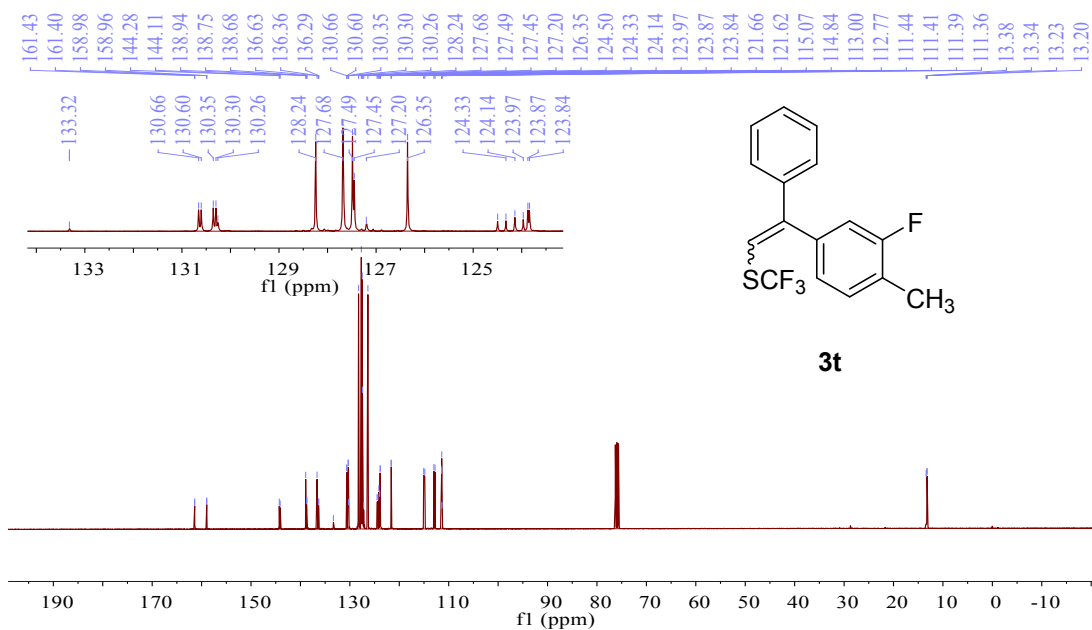

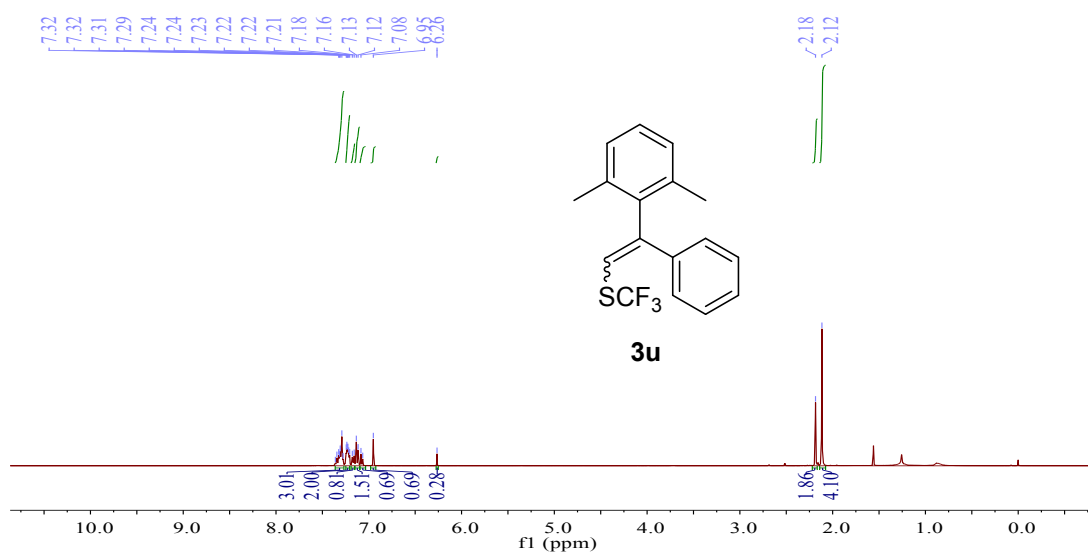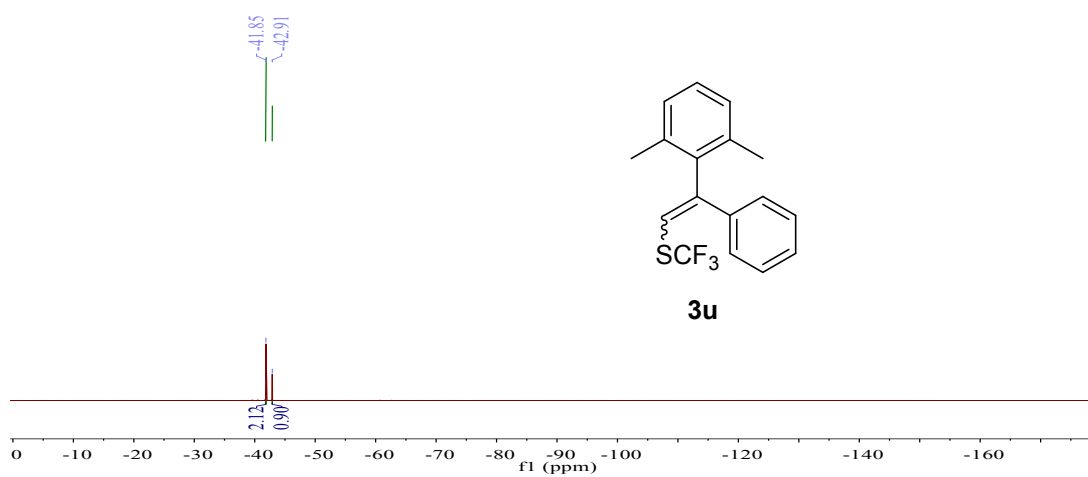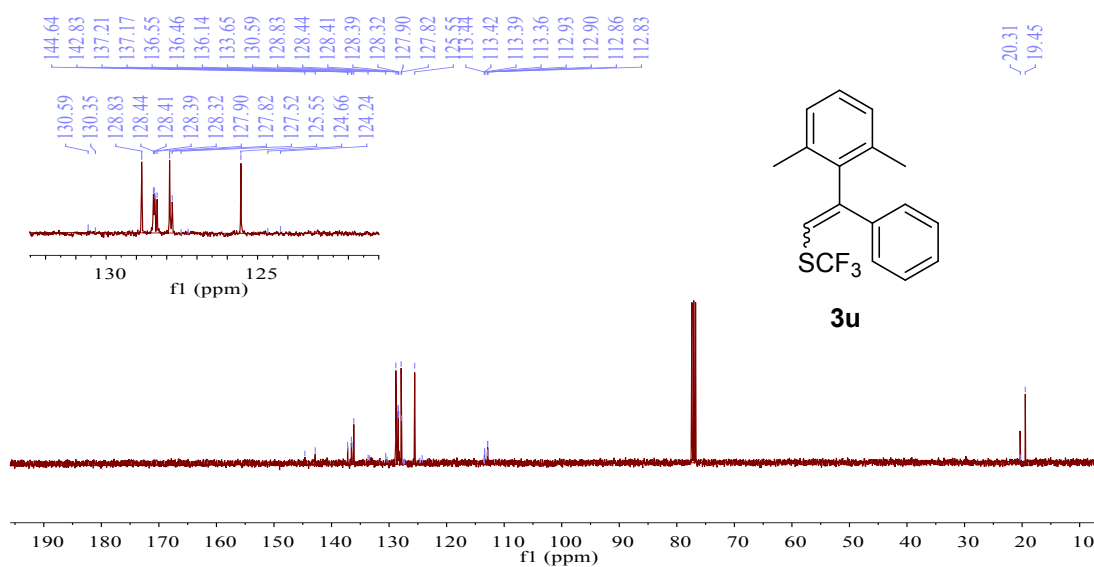

Supplement: c7cc06232j1.pdf [file c7cc06232j1.pdf]
